# Supplementary material for: Phosphorylation of Human Polyomavirus Large and Small T Antigens: An Ignored Research Field
Source: MDPI journal article supplement (doi:10.3390/v15112235), 2023-11-09
Supplement: s1 [file s1]

Supplementary Table S1. Putative phosphorylation sites in SV40 and HPyV LTA<sub>g</sub> and their protein kinase. Putative protein kinases were predicted using the algorithm NetPhos3.1 [1,2]. Protein kinase consensus motifs are based on [3-7]. Proven phosphorylation sites are shown in grey.

| residue | Protein kinase                             | Consensus motif                                     | Sequence in LTA <sub>g</sub> | score                            |
|---------|--------------------------------------------|-----------------------------------------------------|------------------------------|----------------------------------|
| S10     | PKA                                        | K/RK/RXS/T                                          | NREESLQLM                    | 0.749                            |
| S22     | CKI<br>CDK1                                | D/E(X)XS/T<br>LPXSPXKK                              | GLERSAWGN                    | 0.510<br>0.503                   |
| T57     | PKC                                        | R/KR/KR/K/FSFRR                                     | KKMNTLYKK                    | 0.842                            |
| T85     | CKII                                       | D/ED/ED/ES/TD/ED/E                                  | TEIPTYGTD                    | 0.534                            |
| T88     | CKII                                       | D/ED/ED/ES/TD/ED/E                                  | PTYGTDEWE                    | 0.583                            |
| S111    | CKII                                       | D/ED/ED/ES/TD/ED/E                                  | EEMPSSDDE                    | 0.638                            |
| S112    | CKII                                       | D/ED/ED/ES/TD/ED/E                                  | EMPSSDDEA                    | 0.723                            |
| S120    | ATM<br>CKI                                 | L/SSQE/D<br>D/E(X)XS/T                              | ATADSQHST                    | 0.556<br>0.549                   |
| S123    | PKC                                        | R/KR/KR/K/FSFRR                                     | DSQHSTPPK                    | 0.666                            |
| T124    | PKC<br>CDK5<br>p38 <sup>MAPK</sup><br>GSK3 | R/KR/KR/K/FSFRR<br>S/TPXK/H/R<br>PXS/TP<br>S/TXXS/T | SQHSTPPK                     | 0.727<br>0.603<br>0.523<br>0.502 |
| T163    | PKC                                        | R/KR/KR/K/FSFRR                                     | FAIYTTKEK                    | 0.750                            |
| T182    | PKC                                        | R/KR/KR/K/FSFRR                                     | KYSVTFISR                    | 0.829                            |
| S189    | PKA<br>RSK                                 | K/RK/RXS/T<br>RXRXXS/T                              | SRHNSYNHN                    | 0.606<br>0.515                   |
| T199    | p38 <sup>MAPK</sup><br>CDK5                | PXS/TP<br>S/TPXK/H/R                                | LFFLTPHRH                    | 0.567<br>0.535                   |
| S206    | PKA<br>PKG                                 | K/RK/RXS/T<br>R/KR/KXS/T                            | RHRVSAINN                    | 0.748<br>0.556                   |
| T237    | PKC                                        | R/KR/KR/K/FSFRR                                     | YSALTRDPF                    | 0.762                            |
| S242    | CKII<br>PKC                                | D/ED/ED/ES/TD/ED/E<br>R/KR/KR/K/FSFRR               | RDPFSVIEE                    | 0.617<br>0.586                   |
| S247    | CKI<br>DNAPK                               | D/E(X)XS/T<br>QXS/TQE/D                             | VIEESLPGG                    | 0.574<br>0.502                   |
| T265    | CKI                                        | D/E(X)XS/T                                          | EAEETKQVS                    | 0.516                            |
| S269    | PKC                                        | R/KR/KR/K/FSFRR                                     | TKQVSWKV                     | 0.597                            |
| T280    | CKII                                       | D/ED/ED/ES/TD/ED/E                                  | YAMETKCDD                    | 0.504                            |
| S330    | PKC                                        | R/KR/KR/K/FSFRR                                     | IFADSKNQK                    | 0.826                            |
| T343    | PKC                                        | R/KR/KR/K/FSFRR                                     | QAVDTVLAK                    | 0.844                            |
| S352    | PKA                                        | K/RK/RXS/T                                          | KRVDLSQLT                    | 0.835                            |
| T362    | PKC                                        | R/KR/KR/K/FSFRR                                     | EQMLTNRFN                    | 0.722                            |
| T379    | CKII                                       | D/ED/ED/ES/TD/ED/E                                  | MFGSTGSAD                    | 0.521                            |
| S381    | CKII                                       | D/ED/ED/ES/TD/ED/E                                  | GSTGSADIE                    | 0.566                            |
| Y414    | EGFR                                       | XXEXYYXX                                            | KCMVYNIPK                    | 0.505                            |
| T434    | PKC                                        | R/KR/KR/K/FSFRR                                     | SGKTTLAAA                    | 0.593                            |
| T478    | CKII                                       | D/ED/ED/ES/TD/ED/E                                  | DVKGTGGES                    | 0.563                            |
| S482    | CKII                                       | D/ED/ED/ES/TD/ED/E                                  | TGGESRDLP                    | 0.503                            |
| S504    | PKC                                        | R/KR/KR/K/FSFRR                                     | YLDGSVKVN                    | 0.869                            |
| T518    | PKG                                        | R/KR/KXS/T                                          | LNKRTQIFP                    | 0.548                            |
| T527    | CKII<br>PKG                                | D/ED/ED/ES/TD/ED/E<br>R/KR/KXS/T                    | PGIVTMNEY                    | 0.520<br>0.517                   |
| Y531    | SRC                                        | EEDVYGXV                                            | TMNEYSVPK                    | 0.501                            |
| S560    | CKII                                       | D/ED/ED/ES/TD/ED/E                                  | CLERSEFLL                    | 0.528                            |
| S571    | PKA<br>PKC                                 | K/RK/RXS/T<br>R/KR/KR/K/FSFRR                       | RIIQSGIAL                    | 0.804<br>0.698                   |
| S591    | CDK1                                       | LPXSPXKK                                            | EFAQSIQSR                    | 0.509                            |
| S594    | PKC                                        | R/KR/KR/K/FSFRR                                     | QSIQSRIVE                    | 0.601                            |

|      |                     |                                         |                                          |       |
|------|---------------------|-----------------------------------------|------------------------------------------|-------|
| S608 | CKI                 | D/E(X)XS/T                              | DKEFSLSVY                                | 0.518 |
| S610 | PKC                 | R/KR/KR/K/F $\underline{S}$ FRR         | EFSL $\underline{S}$ VYQK                | 0.776 |
| S632 | CKII                | D/ED/ED/ES/TD/ED/E                      | WLRN $\underline{S}$ DDDD                | 0.697 |
| S639 | CKII                | D/ED/ED/ES/TD/ED/E                      | DDED $\underline{S}$ QENA                | 0.648 |
|      | CKI                 | D/E(X)XS/T                              |                                          | 0.606 |
|      | DNAPK               | QXS/TQE/D                               |                                          | 0.603 |
|      | ATM                 | L/ $\underline{S}$ $\underline{S}$ QE/D |                                          | 0.599 |
| S657 | CKII                | D/ED/ED/ES/TD/ED/E                      | NMED $\underline{S}$ GHET                | 0.598 |
| S661 | CKII                | D/ED/ED/ES/TD/ED/E                      | SGHET $\underline{G}$ IDS                | 0.567 |
| S665 | DNAPK               | QXS/TQE/D                               | TGID $\underline{S}$ QSQG                | 0.635 |
|      | ATM                 | L/ $\underline{S}$ $\underline{S}$ QE/D |                                          | 0.577 |
| S667 | DNAPK               | QXS/TQE/D                               | IDSQ $\underline{S}$ QGSF                | 0.604 |
|      | PKC                 | R/KR/KR/K/F $\underline{S}$ FRR         |                                          | 0.601 |
|      | ATM                 | L/ $\underline{S}$ $\underline{S}$ QE/D |                                          | 0.585 |
|      | CDK1                | LPX $\underline{S}$ PXKK                |                                          | 0.520 |
| S670 | CDK1                | LPX $\underline{S}$ PXKK                | QSQ $\underline{S}$ FFQAP                | 0.581 |
|      | PKC                 | R/KR/KR/K/F $\underline{S}$ FRR         |                                          | 0.568 |
| S677 | DNAPK               | QXS/TQE/D                               | APQ $\underline{S}$ QSVH                 | 0.637 |
|      | CDK1                | LPX $\underline{S}$ PXKK                |                                          | 0.560 |
|      | ATM                 | L/ $\underline{S}$ $\underline{S}$ QE/D |                                          | 0.534 |
| S679 | PKC                 | R/KR/KR/K/F $\underline{S}$ FRR         | Q $\underline{S}$ QSVH $\underline{D}$ H | 0.537 |
| Y687 | EGFR                | XXEY $\underline{Y}$ YXX                | HNQPYHICR                                | 0.550 |
| T694 | PKC                 | R/KR/KR/K/F $\underline{S}$ FRR         | CRGFT $\underline{C}$ FKK                | 0.757 |
| T701 | p38 <sup>MAPK</sup> | PXS/T $\underline{P}$                   | KKPPT $\underline{P}$ PPPE               | 0.555 |
|      | GSK3                | $\underline{S}$ /TXXS/T                 |                                          | 0.519 |

Prediction based on motifs for the protein kinases ATM, CDK1, CDK5, CKI, CKII, CaMKII, DNAPK, EGFR, GSK3, INSR, p38<sup>MAPK</sup>, PKA, PKB, PKC, PKG, RSK, and SRC.

#### BKPyV

| residue | Protein kinase      | Consensus motif                         | Sequence in LTag                          | score |
|---------|---------------------|-----------------------------------------|-------------------------------------------|-------|
| T57     | PKC                 | R/KR/KR/K/F $\underline{S}$ FRR         | KRMV $\underline{T}$ LYKK                 | 0.798 |
| S78     | CKII                | D/ED/ED/ES/TD/ED/E                      | FGTW $\underline{S}$ SSEV                 | 0.582 |
| T84     | CKII                | D/ED/ED/ES/TD/ED/E                      | SEVPT $\underline{Y}$ GTE                 | 0.554 |
| Y85     | SRC                 | EEDV $\underline{Y}$ GXV                | EVGT $\underline{Y}$ GTEE                 | 0.531 |
| T87     | CKII                | D/ED/ED/ES/TD/ED/E                      | PTYGT $\underline{E}$ EWE                 | 0.547 |
| S95     | CKII                | D/ED/ED/ES/TD/ED/E                      | ESWW $\underline{S}$ SFNE                 | 0.511 |
| S96     | PKC                 | R/KR/KR/K/F $\underline{S}$ FRR         | SWW $\underline{S}$ FN $\underline{E}$ K  | 0.563 |
|         | CKII                | D/ED/ED/ES/TD/ED/E                      |                                           | 0.541 |
|         | CKI                 | D/E(X)XS/T                              |                                           | 0.529 |
|         | CDK1                | LPX $\underline{S}$ PXKK                |                                           | 0.507 |
| S114    | CKII                | D/ED/ED/ES/TD/ED/E                      | DMFA $\underline{S}$ DEEA                 | 0.687 |
| S122    | ATM                 | L/ $\underline{S}$ $\underline{S}$ QE/D | ATAD $\underline{S}$ QHST                 | 0.555 |
|         | CKI                 | D/E(X)XS/T                              |                                           | 0.550 |
| S125    | PKC                 | R/KR/KR/K/F $\underline{S}$ FRR         | DSQH $\underline{S}$ T $\underline{P}$ PK | 0.666 |
| T126    | PKC                 | R/KR/KR/K/F $\underline{S}$ FRR         | SQHST $\underline{P}$ PKK                 | 0.727 |
|         | CDK5                | $\underline{S}$ /TPXK/H/R               |                                           | 0.603 |
|         | p38 <sup>MAPK</sup> | PXS/T $\underline{P}$                   |                                           | 0.523 |
|         | GSK3                | $\underline{S}$ /TXXS/T                 |                                           | 0.502 |
| S142    | PKG                 | R/KR/KX $\underline{S}$ /T              | KDFP $\underline{S}$ DLHQ                 | 0.548 |
| S149    | PKC                 | R/KR/KR/K/F $\underline{S}$ FRR         | HQFL $\underline{S}$ QAVF                 | 0.749 |
|         | DNAPK               | QXS/TQE/D                               |                                           | 0.614 |
|         | ATM                 | L/ $\underline{S}$ $\underline{S}$ QE/D |                                           | 0.598 |
| T165    | PKC                 | R/KR/KR/K/F $\underline{S}$ FRR         | FAVYT $\underline{T}$ KEK                 | 0.685 |
|         | PKG                 | R/KR/KX $\underline{S}$ /T              |                                           | 0.503 |

|      |                             |                             |                    |       |
|------|-----------------------------|-----------------------------|--------------------|-------|
| T166 | PKC                         | R/KR/KR/K/F <u>S</u> FRR    | AVYT <u>T</u> KEKA | 0.541 |
| T184 | PKC                         | R/KR/KR/K/F <u>S</u> FRR    | KYSV <u>T</u> FISR | 0.829 |
| T201 | CDK5<br>p38 <sup>MAPK</sup> | <u>S</u> /TPXK/H/R          | IFFL <u>T</u> PHRH | 0.579 |
|      |                             | PX <u>S</u> / <u>T</u> P    |                    | 0.572 |
| S208 | PKA                         | K/RK/RX <u>S</u> / <u>T</u> | RHV <u>S</u> AINN  | 0.748 |
|      | PKG                         | R/KR/KX <u>S</u> / <u>T</u> |                    | 0.544 |
| T239 | PKC                         | R/KR/KR/K/F <u>S</u> FRR    | YSAL <u>T</u> RDY  | 0.559 |
| T245 | CKII                        | D/ED/ED/ES/ <u>T</u> D/ED/E | DPYH <u>T</u> IEES | 0.590 |
| S271 | PKC                         | R/KR/KR/K/F <u>S</u> FRR    | TKQV <u>S</u> WKLI | 0.629 |
| T282 | CKII                        | D/ED/ED/ES/ <u>T</u> D/ED/E | YAVET <u>K</u> CED | 0.628 |
| Y299 | INSR                        | <u>Y</u> XXM                | LEFQY <u>N</u> VEE | 0.505 |
| S332 | PKC                         | R/KR/KR/K/F <u>S</u> FRR    | IFAE <u>S</u> KNQK | 0.845 |
| S337 | PKA                         | K/RK/RX <u>S</u> / <u>T</u> | KNQK <u>S</u> ICQQ | 0.506 |
| T345 | PKC                         | R/KR/KR/K/F <u>S</u> FRR    | QAVD <u>T</u> VLAK | 0.844 |
| T354 | PKA                         | K/RK/RX <u>S</u> / <u>T</u> | KRVD <u>T</u> LHMT | 0.669 |
|      | PKG                         | R/KR/KX <u>S</u> / <u>T</u> |                    | 0.551 |
| T358 | CKII                        | D/ED/ED/ES/ <u>T</u> D/ED/E | TLHM <u>T</u> REEM | 0.578 |
| T364 | PKC                         | R/KR/KR/K/F <u>S</u> FRR    | EEM <u>L</u> TERFN | 0.563 |
| T435 | PKC                         | R/KR/KR/K/F <u>S</u> FRR    | DSGK <u>T</u> TLAA | 0.543 |
| T480 | PKC                         | R/KR/KR/K/F <u>S</u> FRR    | DVKG <u>T</u> GAES | 0.684 |
|      | CKII                        | D/ED/ED/ES/ <u>T</u> D/ED/E |                    | 0.598 |
| S484 | CKII                        | D/ED/ED/ES/ <u>T</u> D/ED/E | TGAES <u>K</u> DLP | 0.546 |
| S506 | PKC                         | R/KR/KR/K/F <u>S</u> FRR    | YLDG <u>S</u> VKVN | 0.869 |
|      | CDK1                        | LPX <u>S</u> PXKK           |                    | 0.515 |
| T520 | PKG                         | R/KR/KX <u>S</u> / <u>T</u> | LNKR <u>T</u> QIFP | 0.548 |
| T529 | PKG                         | R/KR/KX <u>S</u> / <u>T</u> | PGLV <u>T</u> MNEY | 0.553 |
| S558 | PKA                         | K/RK/RX <u>S</u> / <u>T</u> | YLRK <u>S</u> LNQS | 0.605 |
|      | RSK                         | RXR <u>X</u> S/ <u>T</u>    |                    | 0.501 |
| S573 | PKA                         | K/RK/RX <u>S</u> / <u>T</u> | RILQSGMTL          | 0.821 |
| S596 | CKII                        | D/ED/ED/ES/ <u>T</u> D/ED/E | TDIQ <u>S</u> RIVE | 0.501 |
| S607 | PKA                         | K/RK/RX <u>S</u> / <u>T</u> | ERLD <u>S</u> EISM | 0.695 |
|      | RSK                         | RXR <u>X</u> S/ <u>T</u>    |                    | 0.551 |
|      | PKG                         | R/KR/KX <u>S</u> / <u>T</u> |                    | 0.509 |
| S610 | CDK1                        | LPX <u>S</u> PXKK           | DSEI <u>S</u> MYTF | 0.515 |
| T613 | PKC                         | R/KR/KR/K/F <u>S</u> FRR    | ISMY <u>T</u> FSRM | 0.752 |
| S615 | PKC                         | R/KR/KR/K/F <u>S</u> FRR    | MYTF <u>S</u> RMKY | 0.658 |
| T631 | CKII                        | D/ED/ED/ES/ <u>T</u> D/ED/E | ILD <u>T</u> REED  | 0.629 |
| S636 | CKII                        | D/ED/ED/ES/ <u>T</u> D/ED/E | REED <u>S</u> ETED | 0.687 |
| T638 | CKII                        | D/ED/ED/ES/ <u>T</u> D/ED/E | EDSE <u>T</u> EDSG | 0.591 |
|      | CKI                         | D/E(X)X <u>S</u> / <u>T</u> |                    | 0.532 |
|      | CDK1                        | LPX <u>S</u> PXKK           |                    | 0.526 |
| S641 | CKI                         | D/E(X)X <u>S</u> / <u>T</u> | ETED <u>S</u> GHGS | 0.569 |
| S645 | CKII                        | D/ED/ED/ES/ <u>T</u> D/ED/E | SGHG <u>S</u> STES | 0.621 |
| S646 | CDK1                        | LPX <u>S</u> PXKK           | GHG <u>S</u> TESQ  | 0.515 |
| T647 | PKC                         | R/KR/KR/K/F <u>S</u> FRR    | HG <u>S</u> TESQS  | 0.639 |
|      | CDK1                        | LPX <u>S</u> PXKK           |                    | 0.551 |
| S649 | DNAPK                       | QX <u>S</u> / <u>T</u> QE/D | SST <u>E</u> SQSQC | 0.647 |
|      | ATM                         | L/ <u>S</u> <u>S</u> QE/D   |                    | 0.527 |
| S651 | DNAPK                       | QX <u>S</u> / <u>T</u> QE/D | TESQ <u>S</u> QCSS | 0.586 |
| S654 | CDK1                        | LPX <u>S</u> PXKK           | QSQC <u>S</u> SQVS | 0.552 |
| S655 | DNAPK                       | QX <u>S</u> / <u>T</u> QE/D | SQC <u>S</u> SQVSD | 0.590 |
| S667 | DNAPK                       | QX <u>S</u> / <u>T</u> QE/D | PAED <u>S</u> QRSD | 0.522 |
|      | ATM                         | L/ <u>S</u> <u>S</u> QE/D   |                    | 0.512 |
| S674 | DNAPK                       | QX <u>S</u> / <u>T</u> QE/D | SDPH <u>S</u> QELH | 0.634 |
|      | ATM                         | L/ <u>S</u> <u>S</u> QE/D   |                    | 0.623 |

|      |                     |            |            |       |
|------|---------------------|------------|------------|-------|
| T691 | p38 <sup>MAPK</sup> | PXS/TP     | KRPKTTPPPK | 0.534 |
|      | GSK3                | S/TXXXS/T  |            | 0.524 |
|      | CDK5                | S/TPXK/H/R |            | 0.514 |

# JCPyV

| residue | Protein kinase              | Consensus motif              | Sequence in LTA <sub>g</sub> | score |
|---------|-----------------------------|------------------------------|------------------------------|-------|
| T84     | CKII                        | D/ED/ED/ES/TD/ED/E           | SEVPTTYGTD                   | 0.509 |
| T87     | CKII                        | D/ED/ED/ES/TD/ED/E           | PTVPTYGTD                    | 0.566 |
| T96     | CKII                        | D/ED/ED/ES/TD/ED/E           | SWWNTTFNEK                   | 0.534 |
| S114    | CKII                        | D/ED/ED/ES/TD/ED/E           | EMFASDDEN                    | 0.699 |
| S121    | DNAPK<br>ATM                | QXS/TQE/D                    | ENTGSQHST                    | 0.634 |
|         |                             | L/S <sub>2</sub> QE/D        |                              | 0.627 |
| S124    | PKC                         | R/KR/KR/K/F <sub>2</sub> FRR | GSQHSTPPK                    | 0.699 |
| T125    | CDK5                        | S/TPXK/H/R                   | SQHSTTPPKK                   | 0.659 |
|         | PKC                         | R/KR/KR/K/F <sub>2</sub> FRR |                              | 0.647 |
|         | GSK3                        | S/TXXXS/T                    |                              | 0.503 |
| S148    | PKC                         | R/KR/KR/K/F <sub>2</sub> FRR | HAFLSQAVF                    | 0.748 |
|         | DNAPK                       | QXS/TQE/D                    |                              | 0.614 |
|         | ATM                         | L/S <sub>2</sub> QE/D        |                              | 0.582 |
| S159    | PKC                         | R/KR/KR/K/F <sub>2</sub> FRR | RTVASFAVY                    | 0.785 |
| T164    | PKC                         | R/KR/KR/K/F <sub>2</sub> FRR | FAVYTTKEK                    | 0.685 |
| T165    | PKC                         | R/KR/KR/K/F <sub>2</sub> FRR | AVYTTKEKA                    | 0.541 |
| T183    | PKC                         | R/KR/KR/K/F <sub>2</sub> FRR | KYSVTFISR                    | 0.829 |
| T200    | p38 <sup>MAPK</sup><br>CDK5 | PXS/TP                       | LEFLTTPHRH                   | 0.567 |
|         |                             | S/TPXK/H/R                   |                              | 0.547 |
| S207    | PKA<br>PKG                  | K/RK/RXS/T                   | RHRVSAINN                    | 0.756 |
|         |                             | R/KR/KXS/T                   |                              | 0.556 |
| S248    | CKI                         | D/E(X)XS/T                   | VVEESIQGG                    | 0.544 |
| S270    | PKC                         | R/KR/KR/K/F <sub>2</sub> FRR | TKQVSWKLV                    | 0.597 |
|         | PKA                         | K/RK/RXS/T                   |                              | 0.505 |
| T281    | CKII                        | D/ED/ED/ES/TD/ED/E           | YALETKCED                    | 0.577 |
| Y322    | SRC                         | EEDVYGXV                     | HEKHYYNAQ                    | 0.502 |
| Y323    | EGFR                        | XXEXYYXX                     | EKHYYNAQI                    | 0.554 |
| S331    | PKC                         | R/KR/KR/K/F <sub>2</sub> FRR | IFADS <sub>2</sub> KNQK      | 0.722 |
| T344    | PKC                         | R/KR/KR/K/F <sub>2</sub> FRR | QAVDTVA <sub>2</sub> AK      | 0.816 |
| S353    | PKA<br>PKG                  | K/RK/RXS/T                   | QRVD <sub>2</sub> SIHMT      | 0.598 |
|         |                             | R/KR/KXS/T                   |                              | 0.514 |
| T357    | CKII                        | D/ED/ED/ES/TD/ED/E           | SIHMTREEM                    | 0.590 |
| T435    | PKC                         | R/KR/KR/K/F <sub>2</sub> FRR | SGKTTLAAA                    | 0.593 |
| T479    | CKII                        | D/ED/ED/ES/TD/ED/E           | DVKG <sub>2</sub> TGAES      | 0.590 |
| S483    | CKII                        | D/ED/ED/ES/TD/ED/E           | TGAESRDLP                    | 0.536 |
| S488    | PKC                         | R/KR/KR/K/F <sub>2</sub> FRR | RDLP <sub>2</sub> SGHGI      | 0.549 |
| S493    | CDK1                        | LPXSPXKK                     | GHG <sub>2</sub> ISNLDC      | 0.529 |
| S505    | PKC                         | R/KR/KR/K/F <sub>2</sub> FRR | YLDG <sub>2</sub> SVKVN      | 0.569 |
| T519    | CDK1                        | LPXSPXKK                     | QNKRTQVFP                    | 0.513 |
| T528    | CKII                        | D/ED/ED/ES/TD/ED/E           | PGIVTMNEY                    | 0.520 |
| S533    | CDK1                        | LPXSPXKK                     | MNEYSVPR <sub>2</sub> T      | 0.516 |
| S557    | RSK                         | RXRXS/T                      | YLRKSLSCS                    | 0.541 |
| S559    | PKA                         | K/RK/RXS/T                   | RKSLSCSEY                    | 0.575 |
| S561    | CKII                        | D/ED/ED/ES/TD/ED/E           | SLSCSEYLL                    | 0.521 |
| S572    | PKA                         | K/RK/RXS/T                   | RILOSGMTL                    | 0.824 |
| S609    | CDK1                        | LPXSPXKK                     | DLEISMYTF                    | 0.515 |
| Y611    | EGFR                        | XXEXYYXX                     | EISMYTFST                    | 0.515 |
| S614    | PKC                         | R/KR/KR/K/F <sub>2</sub> FRR | MYTFSTMKA                    | 0.731 |

|      |                     |                           |                                     |       |
|------|---------------------|---------------------------|-------------------------------------|-------|
| T615 | PKC                 | R/KR/KR/K/F <u>S</u> FRR  | YTF <u>S</u> T <u>M</u> KAN         | 0.911 |
| S635 | CKII                | D/ED/ED/ES/TD/ED/E        | REED <u>S</u> EAED                  | 0.699 |
| S640 | CKI                 | D/E(X)X <u>S</u> /T       | EAED <u>S</u> G <u>H</u> G <u>S</u> | 0.542 |
| S644 | CKII                | D/ED/ED/ES/TD/ED/E        | SG <u>H</u> G <u>S</u> STES         | 0.621 |
| S645 | CDK1                | LPX <u>S</u> PXKK         | G <u>H</u> G <u>S</u> STESQ         | 0.505 |
| T646 | PKC                 | R/KR/KR/K/F <u>S</u> FRR  | H <u>G</u> SSTESQS                  | 0.639 |
| S648 | DNAPK               | QX <u>S</u> /TQE/D        | SSTESQSQC                           | 0.647 |
| S650 | DNAPK               | QX <u>S</u> /TQE/D        | TESQSQCF <u>S</u>                   | 0.586 |
| S654 | DNAPK               | QX <u>S</u> /TQE/D        | SQCF <u>S</u> QVSE                  | 0.520 |
| T664 | ATM                 | L/ <u>S</u> <u>S</u> QE/D | SGADTQENC                           | 0.517 |
|      | CKII                | D/ED/ED/ES/TD/ED/E        |                                     | 0.513 |
| T648 | p38 <sup>MAPK</sup> | PX <u>S</u> /TP           | KKPKTPPPK                           | 0.548 |
|      | GSK3                | <u>S</u> /TXXS/T          |                                     | 0.520 |

#### KIPyV

| residue | Protein kinase      | Consensus motif           | Sequence in LTag            | score |
|---------|---------------------|---------------------------|-----------------------------|-------|
| S6      | CKII                | D/ED/ED/ES/TD/ED/E        | DKTLT <u>R</u> EEA          | 0.518 |
| S65     | CDK1                | LPX <u>S</u> PXKK         | KLQD <u>S</u> VSSV          | 0.514 |
| S82     | CDK1                | LPX <u>S</u> PXKK         | NIWQ <u>S</u> SQIP          | 0.516 |
| S83     | DNAPK               | QX <u>S</u> /TQE/D        | IWQSSQIPT                   | 0.574 |
|         | ATM                 | L/ <u>S</u> <u>S</u> QE/D |                             | 0.533 |
| T90     | p38 <sup>MAPK</sup> | PX <u>S</u> /TP           | PTYGT <u>P</u> DL           | 0.540 |
| S98     | ATM                 | L/ <u>S</u> <u>S</u> QE/D | DEWWSQFNT                   | 0.633 |
|         | DNAPK               | QX <u>S</u> /TQE/D        |                             | 0.605 |
| T102    | CKII                | D/ED/ED/ES/TD/ED/E        | SQFN <u>T</u> YWEE          | 0.699 |
| S113    | DNAPK               | QX <u>S</u> /TQE/D        | RCNE <u>S</u> MPSS          | 0.543 |
| S116    | PKC                 | R/KR/KR/K/F <u>S</u> FRR  | ESMP <u>S</u> SPKR          | 0.633 |
| S117    | CDK5                | <u>S</u> /TPXK/H/R        | SMP <u>S</u> SPKRS          | 0.635 |
|         | GSK3                | <u>S</u> /TXXS/T          |                             | 0.535 |
| S121    | PKG                 | R/KR/KX <u>S</u> /T       | SPKR <u>S</u> AP <u>E</u> E | 0.612 |
|         | CKII                | D/ED/ED/ES/TD/ED/E        |                             | 0.590 |
| S130    | DNAPK               | QX <u>S</u> /TQE/D        | EPSC <u>S</u> QATP          | 0.621 |
|         | ATM                 | L/ <u>S</u> <u>S</u> QE/D |                             | 0.586 |
| T133    | p38 <sup>MAPK</sup> | PX <u>S</u> /TP           | CSQATPPKK                   | 0.565 |
|         | CDK5                | <u>S</u> /TPXK/H/R        |                             | 0.525 |
| S144    | DNAPK               | QX <u>S</u> /TQE/D        | AFDAS <u>L</u> E <u>E</u> P | 0.558 |
| S161    | PKC                 | R/KR/KR/K/F <u>S</u> FRR  | HAVF <u>S</u> NKCI          | 0.899 |
| T172    | PKC                 | R/KR/KR/K/F <u>S</u> FRR  | FVVHTTREK                   | 0.836 |
|         | CKII                | D/ED/ED/ES/TD/ED/E        |                             | 0.521 |
| S191    | PKC                 | R/KR/KR/K/F <u>S</u> FRR  | KYQC <u>S</u> FISK          | 0.778 |
| T208    | p38 <sup>MAPK</sup> | PX <u>S</u> /TP           | IFFLT <u>P</u> HKH          | 0.585 |
|         | CDK5                | <u>S</u> /TPXK/H/R        |                             | 0.539 |
| S215    | PKA                 | K/RK/RX <u>S</u> /T       | KHRV <u>S</u> AINN          | 0.758 |
|         | PKG                 | R/KR/KX <u>S</u> /T       |                             | 0.569 |
| S228    | PKC                 | R/KR/KR/K/F <u>S</u> FRR  | HCTV <u>S</u> FLFC          | 0.720 |
| S303    | PKC                 | R/KR/KR/K/F <u>S</u> FRR  | YLLGS <u>Y</u> IRF          | 0.771 |
| T309    | CKII                | D/ED/ED/ES/TD/ED/E        | IRFAT <u>K</u> PEE          | 0.530 |
| S318    | CKII                | D/ED/ED/ES/TD/ED/E        | CEKCSKNDD                   | 0.509 |
| T324    | PKC                 | R/KR/KR/K/F <u>S</u> FRR  | NDDAT <u>H</u> KRV          | 0.886 |
| T350    | DNAPK               | QX <u>S</u> /TQE/D        | KNACTQ <u>A</u> ID          | 0.525 |
| Y362    | EGFR                | XXEXY <u>Y</u> YXX        | AERR <u>Y</u> NCVT          | 0.522 |
| T366    | PKC                 | R/KR/KR/K/F <u>S</u> FRR  | YNCV <u>T</u> LTRK          | 0.878 |
| T368    | PKC                 | R/KR/KR/K/F <u>S</u> FRR  | CVTL <u>T</u> RKKL          | 0.883 |
| T374    | PKC                 | R/KR/KR/K/F <u>S</u> FRR  | KKLLT <u>K</u> RFK          | 0.940 |

|      |              |                                            |                        |                |
|------|--------------|--------------------------------------------|------------------------|----------------|
| S400 | PKA          | K/RK/RXS/T                                 | LYMASIAWY              | 0.510          |
| T405 | PKC          | R/KR/KR/K/F <sub>S</sub> FRR               | IAWYTGLNK              | 0.766          |
| S440 | PKA          | K/RK/RXS/T                                 | GPINS <sub>G</sub> KTT | 0.528          |
| S528 | PKG          | R/KR/KXS/T                                 | VNKR <sub>S</sub> QIFP | 0.514          |
| T537 | CKII<br>PKG  | D/ED/ED/ES/TD/ED/E<br>R/KR/KXS/T           | PGIVTMNEY              | 0.563<br>0.537 |
| T546 | PKC          | R/KR/KR/K/F <sub>S</sub> FRR               | CIPETVAVR              | 0.591          |
| T558 | PKC          | R/KR/KR/K/F <sub>S</sub> FRR               | TVMFTIKRN              | 0.883          |
| S566 | DNAPK        | QXS/TQE/D                                  | NLRESLEKT              | 0.532          |
| T570 | CDK5<br>GSK3 | S/TPXK/H/R<br>S/TXXS/T                     | SLEKTPQLL              | 0.649<br>0.501 |
| S575 | PKC<br>ATM   | R/KR/KR/K/F <sub>S</sub> FRR<br>L/SSQE/D   | PQLLSQRIL              | 0.650<br>0.518 |
| S581 | PKC<br>PKA   | R/KR/KR/K/F <sub>S</sub> FRR<br>K/RK/RXS/T | RILHSGIAM              | 0.672<br>0.589 |
| S596 | CKII         | D/ED/ED/ES/TD/ED/E                         | YRPVSDFDE              | 0.556          |
| S604 | CKII         | D/ED/ED/ES/TD/ED/E                         | EEIQSNVVY              | 0.528          |
| T620 | PKC          | R/KR/KR/K/F <sub>S</sub> FRR               | YIGLIEFAT              | 0.590          |
| T630 | PKC          | R/KR/KR/K/F <sub>S</sub> FRR               | QMNVTTNGKN             | 0.675          |

## WU

| residue | Protein kinase                     | Consensus motif                                    | Sequence in LTag       | score                   |
|---------|------------------------------------|----------------------------------------------------|------------------------|-------------------------|
| T4      | CDK1                               | LPXSPXKK                                           | MDKTLSRN               | 0.505                   |
| S6      | PKC<br>CKII                        | R/KR/KR/K/F <sub>S</sub> FRR<br>D/ED/ED/ES/TD/ED/E | DKTLSRNEAA             | 0.621<br>0.547          |
| T32     | PKC                                | R/KR/KR/K/F <sub>S</sub> FRR                       | PLMRITKYL              | 0.512                   |
| S36     | PKC                                | R/KR/KR/K/F <sub>S</sub> FRR                       | TKYL <sub>S</sub> KCKE | 0.638                   |
| S57     | PKA<br>PKC                         | K/RK/RXS/T<br>R/KR/KR/K/F <sub>S</sub> FRR         | KKLN <sub>S</sub> LYLK | 0.681<br>0.620          |
| S82     | CDK1                               | LPXSPXKK                                           | EVWSSSQIP              | 0.529                   |
| S83     | DNAPK<br>ATM<br>CDK1               | QXS/TQE/D<br>L/SSQE/D<br>LPXSPXKK                  | VWSSSQIPT              | 0.588<br>0.519<br>0.505 |
| T90     | CDK5<br>p38 <sup>MAPK</sup>        | S/TPXK/H/R<br>PXS/TP                               | PTYGTDPWD              | 0.552<br>0.506          |
| Y95     | EGFR                               | XXEXYYXX                                           | PDWDYWWSQ              | 0.550                   |
| S98     | ATM<br>DNAPK                       | L/SSQE/D<br>QXS/TQE/D                              | DYWW <sub>S</sub> QFNS | 0.639<br>0.605          |
| S102    | CKII                               | D/ED/ED/ES/TD/ED/E                                 | SQFNSYWEE              | 0.701                   |
| S117    | GSK3<br>CKI<br>p38 <sup>MAPK</sup> | S/TXXS/T<br>D/E(X)XS/T<br>PXS/TP                   | EMPKSPGET              | 0.540<br>0.522<br>0.519 |
| T121    | CDK5<br>p38 <sup>MAPK</sup>        | S/TPXK/H/R<br>PXS/TP                               | SPGETPTKR              | 0.591<br>0.522          |
| T126    | CKII                               | D/ED/ED/ES/TD/ED/E                                 | PTKRTREDD              | 0.511                   |
| S136    | DNAPK<br>ATM                       | QXS/TQE/D<br>L/SSQE/D                              | EPQCSQATP              | 0.612<br>0.537          |
| T139    | p38 <sup>MAPK</sup><br>CDK5        | PXS/TP<br>S/TPXK/H/R                               | CSQATPPKK              | 0.571<br>0.515          |
| S152    | DNAPK                              | QXS/TQE/D                                          | ATDASLSFP              | 0.561                   |
| S154    | PKC                                | R/KR/KR/K/F <sub>S</sub> FRR                       | DASLSFPKE              | 0.670                   |
| S164    | DNAPK                              | QXS/TQE/D                                          | EEFVSQAVF              | 0.585                   |

|      |                     |                              |                         |       |
|------|---------------------|------------------------------|-------------------------|-------|
|      | ATM                 | L/SSQE/D                     |                         | 0.562 |
| T180 | PKC                 | R/KR/KR/K/F <sub>S</sub> FRR | FVIHTTKEK               | 0.815 |
|      | CKII                | D/ED/ED/ES/TD/ED/E           |                         | 0.553 |
| T181 | PKC                 | R/KR/KR/K/F <sub>S</sub> FRR | VIHTTKEKA               | 0.525 |
| T187 | PKC                 | R/KR/KR/K/F <sub>S</sub> FRR | EKAETLYKK               | 0.759 |
| S194 | PKC                 | R/KR/KR/K/F <sub>S</sub> FRR | KKLLSKFKC               | 0.842 |
| S202 | PKG                 | R/KR/KXS/T                   | CNFA <sub>S</sub> RHSY  | 0.543 |
| S205 | PKA                 | K/RK/RXS/T                   | ASRHSYYNT               | 0.830 |
|      | DNAPK               | QXS/TQE/D                    |                         | 0.552 |
| T216 | p38 <sup>MAPK</sup> | PXS/TP                       | VFILT <sub>P</sub> FRH  | 0.654 |
|      | CDK5                | S/TPXK/H/R                   |                         | 0.507 |
| S223 | PKA                 | K/RK/RXS/T                   | RHRV <sub>S</sub> AVNN  | 0.725 |
| Y247 | EGFR                | XXEXYYXX                     | VNNAYGLYS               | 0.513 |
| T254 | PKC                 | R/KR/KR/K/F <sub>S</sub> FRR | YSRMT <sub>R</sub> DPF  | 0.542 |
| T259 | CKII                | D/ED/ED/ES/TD/ED/E           | RDPFT <sub>L</sub> CEE  | 0.620 |
| Y280 | SRC                 | EEDVYGXV                     | AEDLYGEFK               | 0.552 |
| S293 | CKII                | D/ED/ED/ES/TD/ED/E           | WKAL <sub>S</sub> EFAL  | 0.518 |
| S326 | CDK1                | LPXSPXKK                     | EKCNS <sub>N</sub> NEDA | 0.539 |
|      | CKII                | D/ED/ED/ES/TD/ED/E           |                         | 0.507 |
| S351 | PKC                 | R/KR/KR/K/F <sub>S</sub> FRR | SDSK <sub>S</sub> SQKNV | 0.601 |
| S371 | PKA                 | K/RK/RXS/T                   | RRVDS <sub>L</sub> LNMS | 0.757 |
| T394 | PKC                 | R/KR/KR/K/F <sub>S</sub> FRR | KMDK <sub>T</sub> IKGE  | 0.681 |
| T451 | PKC                 | R/KR/KR/K/F <sub>S</sub> FRR | SGKT <sub>T</sub> VAAA  | 0.763 |
| S509 | CDK1                | LPXSPXKK                     | GNGMS <sub>N</sub> NLDN | 0.547 |
| S521 | PKC                 | R/KR/KR/K/F <sub>S</sub> FRR | YLDG <sub>S</sub> VKVN  | 0.869 |
| S535 | PKG                 | R/KR/KXS/T                   | LNKR <sub>S</sub> QIFP  | 0.545 |
| T544 | PKG                 | R/KR/KXS/T                   | PGIV <sub>T</sub> MNEY  | 0.546 |
|      | CKII                | D/ED/ED/ES/TD/ED/E           |                         | 0.506 |
| T561 | PKC                 | R/KR/KR/K/F <sub>S</sub> FRR | RFHK <sub>T</sub> VLFT  | 0.538 |
| T565 | PKC                 | R/KR/KR/K/F <sub>S</sub> FRR | TVLFT <sub>P</sub> PKRH | 0.783 |
|      | p38 <sup>MAPK</sup> | PXS/TP                       |                         | 0.533 |
| S573 | PKC                 | R/KR/KR/K/F <sub>S</sub> FRR | HLKE <sub>S</sub> LDKT  | 0.807 |
| T577 | CDK5                | S/TPXK/H/R                   | SLDK <sub>T</sub> PELM  | 0.651 |
|      | GSK3                | S/TXXS/T                     |                         | 0.520 |
|      | p38 <sup>MAPK</sup> | PXS/TP                       |                         | 0.502 |
| S588 | PKC                 | R/KR/KR/K/F <sub>S</sub> FRR | RVLQ <sub>S</sub> GMCI  | 0.701 |
|      | PKA                 | K/RK/RXS/T                   |                         | 0.585 |
| S603 | PKA                 | K/RK/RXS/T                   | CRPV <sub>S</sub> DFHP  | 0.644 |
| T627 | PKC                 | R/KR/KR/K/F <sub>S</sub> FRR | YIGL <sub>T</sub> EFAD  | 0.534 |

#### MCPyV

| residue | Protein kinase | Consensus motif              | Sequence in LTag       | score |
|---------|----------------|------------------------------|------------------------|-------|
| Y24     | INSR           | YXXM                         | APNCYGNIP              | 0.568 |
| S37     | PKC            | R/KR/KR/K/F <sub>S</sub> FRR | AFKR <sub>S</sub> CLKH | 0.567 |
|         | PKG            | R/KR/KXS/T                   |                        | 0.521 |
| T57     | PKC            | R/KR/KR/K/F <sub>S</sub> FRR | MELN <sub>T</sub> LWSK | 0.571 |
| S60     | PKC            | R/KR/KR/K/F <sub>S</sub> FRR | NTLW <sub>S</sub> KFQQ | 0.654 |
| Y85     | EGFR           | XXEXYYXX                     | EAPIYGTK               | 0.524 |
| T87     | PKC            | R/KR/KR/K/F <sub>S</sub> FRR | PIYG <sub>T</sub> TKFK | 0.918 |
| T88     | PKC            | R/KR/KR/K/F <sub>S</sub> FRR | IYGT <sub>T</sub> KFKE | 0.660 |
| S100    | PKC            | R/KR/KR/K/F <sub>S</sub> FRR | SGGF <sub>S</sub> FGKA | 0.687 |
|         | CKI            | D/E(X)XS/T                   |                        | 0.542 |
| S116    | PKC            | R/KR/KR/K/F <sub>S</sub> FRR | HGTN <sub>S</sub> SRK  | 0.761 |
| S118    | CDK1           | LPXSPXKK                     | TNSR <sub>S</sub> RKPS | 0.508 |

|      |                                             |                                                                                       |                    |                                  |
|------|---------------------------------------------|---------------------------------------------------------------------------------------|--------------------|----------------------------------|
| S122 | PKB<br>PKG<br>RSK                           | RXR <u>X</u> *X*S/TF/L<br>R/KR/KX <u>S</u> /T<br>RXRX <u>X</u> S/T                    | SRKP <u>S</u> SNAS | 0.638<br>0.628<br>0.577          |
| S123 | PKC                                         | R/KR/KR/K/F <u>S</u> FRR                                                              | RKP <u>S</u> SNASR | 0.656                            |
| S126 | CDK1                                        | LPX <u>S</u> PXKK                                                                     | SSNA <u>S</u> RGAP | 0.523                            |
| S131 | CDK1                                        | LPX <u>S</u> PXKK                                                                     | RGAP <u>S</u> GSSP | 0.521                            |
| S133 | CDK1                                        | LPX <u>S</u> PXKK                                                                     | APSG <u>S</u> SPPH | 0.601                            |
| S134 | CDK5<br>CDK1<br>p38 <sup>MAPK</sup><br>GSK3 | <u>S</u> /TPXK/H/R<br>LPX <u>S</u> PXKK<br>PX <u>S</u> /TP<br><u>S</u> /TXXS/T        | PSG <u>S</u> SPPHS | 0.636<br>0.554<br>0.506<br>0.502 |
| S138 | DNAPK<br>GSK3                               | QX <u>S</u> /TQE/D<br><u>S</u> /TXXS/T                                                | SPPH <u>S</u> QSSS | 0.636<br>0.502                   |
| S140 | CDK1                                        | LPX <u>S</u> PXKK                                                                     | PHSQ <u>S</u> SSSG | 0.591                            |
| S141 | CKI                                         | D/E(X)X <u>S</u> /T                                                                   | HSQ <u>S</u> SSSGY | 0.563                            |
| S142 | CDK1                                        | LPX <u>S</u> PXKK                                                                     | SQ <u>S</u> SSSGYG | 0.536                            |
| S147 | PKC<br>CDK1                                 | R/KR/KR/K/F <u>S</u> FRR<br>LPX <u>S</u> PXKK                                         | SGYG <u>S</u> FSAS | 0.741<br>0.507                   |
| S149 | CDK1                                        | LPX <u>S</u> PXKK                                                                     | YGSF <u>S</u> ASQA | 0.596                            |
| S151 | DNAPK<br>ATM<br>CDK1                        | QX <u>S</u> /TQE/D<br>L/SSQE/D<br>LPX <u>S</u> PXKK                                   | SFS <u>A</u> SQASD | 0.637<br>0.622<br>0.531          |
| S156 | DNAPK<br>CDK1                               | QX <u>S</u> /TQE/D<br>LPX <u>S</u> PXKK                                               | QASD <u>S</u> QSRG | 0.598<br>0.559                   |
| S175 | CDK1                                        | LPX <u>S</u> PXKK                                                                     | PTSS <u>S</u> GSSS | 0.500                            |
| S177 | CKII<br>CDK1<br>CKI                         | D/ED/ED/ES/ <u>T</u> D/ED/E<br>LPX <u>S</u> PXKK<br>D/E(X)X <u>S</u> /T               | SSSG <u>S</u> SSRE | 0.536<br>0.516<br>0.513          |
| S178 | PKC<br>CKII                                 | R/KR/KR/K/F <u>S</u> FRR<br>D/ED/ED/ES/ <u>T</u> D/ED/E                               | SSG <u>S</u> SSREE | 0.684<br>0.572                   |
| S179 | CKII                                        | D/ED/ED/ES/ <u>T</u> D/ED/E                                                           | SGSS <u>S</u> REET | 0.605                            |
| T184 | CDK1                                        | LPX <u>S</u> PXKK                                                                     | REET <u>T</u> NSGR | 0.531                            |
| S186 | PKC                                         | R/KR/KR/K/F <u>S</u> FRR                                                              | ETT <u>N</u> SGRES | 0.581                            |
| S190 | PKA                                         | K/RK/RX <u>S</u> /T                                                                   | SGRES <u>T</u> PN  | 0.604                            |
| S191 | PKA<br>RSK                                  | K/RK/RX <u>S</u> /T<br>RXRX <u>X</u> S/T                                              | GRES <u>T</u> PNG  | 0.685<br>0.503                   |
| T192 | CDK1                                        | LPX <u>S</u> PXKK                                                                     | RES <u>T</u> PNGT  | 0.503                            |
| T196 | CDK1                                        | LPX <u>S</u> PXKK                                                                     | TPNG <u>T</u> DVPR | 0.503                            |
| S197 | PKC                                         | R/KR/KR/K/F <u>S</u> FRR                                                              | PNG <u>T</u> SVPRN | 0.666                            |
| S202 | PKA                                         | K/RK/RX <u>S</u> /T                                                                   | VPRN <u>S</u> SRTD | 0.576                            |
| S203 | PKA                                         | K/RK/RX <u>S</u> /T                                                                   | PRN <u>S</u> SRTDG | 0.671                            |
| T205 | CKII                                        | D/ED/ED/ES/ <u>T</u> D/ED/E                                                           | NSSR <u>T</u> DGTW | 0.508                            |
| S217 | DNAPK<br>CDK1                               | QX <u>S</u> /TQE/D<br>LPX <u>S</u> PXKK                                               | FCDE <u>S</u> LSSP | 0.570<br>0.528                   |
| S219 | CKII<br>CDK1                                | D/ED/ED/ES/ <u>T</u> D/ED/E<br>LPX <u>S</u> PXKK                                      | DESL <u>S</u> SPEP | 0.628<br>0.524                   |
| S220 | p38 <sup>MAPK</sup>                         | PX <u>S</u> /TP                                                                       | ESL <u>S</u> SPEPP | 0.535                            |
| S225 | CKII                                        | D/ED/ED/ES/ <u>T</u> D/ED/E                                                           | PEPP <u>S</u> SSEE | 0.673                            |
| S226 | CKII                                        | D/ED/ED/ES/ <u>T</u> D/ED/E                                                           | EPP <u>S</u> SSEEP | 0.664                            |
| S227 | CKII                                        | D/ED/ED/ES/ <u>T</u> D/ED/E                                                           | PPSS <u>S</u> EEPE | 0.620                            |
| S235 | GSK3                                        | <u>S</u> /TXXS/T                                                                      | EEPP <u>S</u> SRSS | 0.507                            |
| S238 | CDK1                                        | LPX <u>S</u> PXKK                                                                     | PSSR <u>S</u> SPRQ | 0.553                            |
| S239 | CDK5<br>p38 <sup>MAPK</sup><br>GSK3<br>PKC  | <u>S</u> /TPXK/H/R<br>PX <u>S</u> /TP<br><u>S</u> /TXXS/T<br>R/KR/KR/K/F <u>S</u> FRR | SSR <u>S</u> SPRQP | 0.717<br>0.579<br>0.516<br>0.505 |



|      |                     |                    |                        |       |
|------|---------------------|--------------------|------------------------|-------|
| S245 | CDK1                | LPXSPXKK           | RQPPSSSAE              | 0.577 |
| S246 | CKII                | D/ED/ED/ES/TD/ED/E | QPPSSSAEE              | 0.618 |
| S247 | CDK1                | LPXSPXKK           | PPSSSAEEA              | 0.543 |
| S253 | CKII                | D/ED/ED/ES/TD/ED/E | EEASSSQFT              | 0.520 |
|      | CDK1                | LPXSPXKK           |                        | 0.520 |
| S254 | ATM                 | L/SSQE/D           | EASSSQFTD              | 0.605 |
|      | CKII                | D/ED/ED/ES/TD/ED/E |                        | 0.575 |
|      | DNAPK               | QXS/TQE/D          |                        | 0.564 |
|      | CKI                 | D/E(X)XS/T         |                        | 0.552 |
|      | CDK1                | LPXSPXKK           |                        | 0.505 |
| T257 | CKII                | D/ED/ED/ES/TD/ED/E | SSQFTDEEY              | 0.600 |
| Y261 | SRC                 | EEDVYGXV           | TDEEYRSSS              | 0.541 |
| S263 | CKII                | D/ED/ED/ES/TD/ED/E | EEYRSSSFT              | 0.502 |
| S264 | CKI                 | D/E(X)XS/T         | EYRSSSFTT              | 0.524 |
|      | PKA                 | K/RK/RXS/T         |                        | 0.510 |
| S265 | CKI                 | D/E(X)XS/T         | YRSSSFTTP              | 0.590 |
|      | PKA                 | K/RK/RXS/T         |                        | 0.578 |
| T267 | PKC                 | R/KR/KR/K/FSFRR    | SSSFTTPKT              | 0.886 |
| T268 | CDK5                | S/TPXK/H/R         | SSFTTPKTP              | 0.678 |
|      | p38 <sup>MAPK</sup> | PXS/TP             |                        | 0.514 |
| T271 | CDK5                | S/TPXK/H/R         | TTPKTTPPF              | 0.610 |
|      | p38 <sup>MAPK</sup> | PXS/TP             |                        | 0.526 |
|      | GSK3                | S/TXXS/T           |                        | 0.510 |
| S276 | PKC                 | R/KR/KR/K/FSFRR    | PPPF <sub>S</sub> RKRK | 0.829 |
| S284 | PKC                 | R/KR/KR/K/FSFRR    | KFGGSRSSA              | 0.632 |
|      | CDK1                | LPXSPXKK           |                        | 0.527 |
| S287 | CDK1                | LPXSPXKK           | GSRSSASSA              | 0.554 |
| S290 | PKC                 | R/KR/KR/K/FSFRR    | SSASSASSA              | 0.623 |
| S292 | CDK1                | LPXSPXKK           | ASSASSASF              | 0.527 |
| S293 | CDK1                | LPXSPXKK           | SSASSASFT              | 0.527 |
| T297 | PKC                 | R/KR/KR/K/FSFRR    | SASFTSTTP              | 0.681 |
| T299 | CDK5                | S/TPXK/H/R         | SFTSTPPKP              | 0.748 |
|      | PKC                 | R/KR/KR/K/FSFRR    |                        | 0.729 |
|      | p38 <sup>MAPK</sup> | PXS/TP             |                        | 0.506 |
| S320 | CKII                | D/ED/ED/ES/TD/ED/E | PIDLSDYLS              | 0.509 |
| S324 | PKC                 | R/KR/KR/K/FSFRR    | SDYL <sub>S</sub> HAVY | 0.619 |
| S329 | PKC                 | R/KR/KR/K/FSFRR    | HAVY <sub>S</sub> NKTV | 0.721 |
| T341 | CKII                | D/ED/ED/ES/TD/ED/E | AIYTTSDKA              | 0.543 |
| S342 | PKC                 | R/KR/KR/K/FSFRR    | IYTTSDKAI              | 0.852 |
|      | CKII                | D/ED/ED/ES/TD/ED/E |                        | 0.504 |
| T375 | CDK1                | LPXSPXKK           | LLFITLSKH              | 0.514 |
| S377 | PKC                 | R/KR/KR/K/FSFRR    | FITL <sub>S</sub> KHRV | 0.842 |
|      | CDK1                | LPXSPXKK           |                        | 0.502 |
| S382 | PKA                 | K/RK/RXS/T         | KHRV <sub>S</sub> AIKN | 0.693 |
|      | PKG                 | R/KR/KXS/T         |                        | 0.566 |
|      | PKC                 | R/KR/KR/K/FSFRR    |                        | 0.514 |
| T390 | PKC                 | R/KR/KR/K/FSFRR    | NFCSTFCTI              | 0.567 |
| S501 | PKC                 | R/KR/KR/K/FSFRR    | LFYESKSQK              | 0.712 |
| T514 | PKC                 | R/KR/KR/K/FSFRR    | QAADTVLAK              | 0.697 |
|      | CDK1                | LPXSPXKK           |                        | 0.501 |
| T527 | CKII                | D/ED/ED/ES/TD/ED/E | MLEMTIRTEM             | 0.513 |
| T580 | PKC                 | R/KR/KR/K/FSFRR    | IQLLTENIP              | 0.619 |
| S601 | PKC                 | R/KR/KR/K/FSFRR    | SGKTSFAAA              | 0.614 |
| S647 | DNAPK               | QXS/TQE/D          | KGQNSLNKD              | 0.514 |
| S675 | CDK1                | LPXSPXKK           | AVAVSLEKK              | 0.503 |
| T694 | PKG                 | R/KR/KXS/T         | PCIVTANDY              | 0.627 |

|      |              |                             |                            |       |
|------|--------------|-----------------------------|----------------------------|-------|
| T703 | PKC          | R/KR/KR/K/F <u>S</u> FRR    | FIPK <u>T</u> LIAR         | 0.652 |
| S709 | PKC          | R/KR/KR/K/F <u>S</u> FRR    | IARF <u>S</u> YTLH         | 0.582 |
| T711 | PKC          | R/KR/KR/K/F <u>S</u> FRR    | RFSY <u>T</u> LHFS         | 0.698 |
| S723 | PKA          | K/RK/RX <u>S</u> /T         | NLRD <u>S</u> LDQN         | 0.576 |
| S738 | PKA          | K/RK/RX <u>S</u> /T         | RILQ <u>S</u> GTTL         | 0.682 |
| T741 | CDK1         | LPX <u>S</u> PXKK           | QSGT <u>T</u> LLLC         | 0.549 |
| S772 | PKC          | R/KR/KR/K/F <u>S</u> FRR    | QILQ <u>S</u> EISY         | 0.788 |
| T806 | CKII<br>CKI  | D/ED/ED/ES/ <u>T</u> D/ED/E | GPEE <u>T</u> EETQ         | 0.608 |
|      |              | D/E(X)X <u>S</u> /T         |                            | 0.606 |
| T809 | DNAPK<br>CKI | QX <u>S</u> /TQE/D          | ETE <u>E</u> TQDSG         | 0.597 |
|      |              | D/E(X)X <u>S</u> /T         |                            | 0.520 |
| S812 | CKI          | D/E(X)X <u>S</u> /T         | ETQD <u>S</u> GTFS         | 0.506 |
| T814 | PKC          | R/KR/KR/K/F <u>S</u> FRR    | QD <u>S</u> G <u>T</u> FSQ | 0.705 |
| S816 | ATM<br>DNAPK | L/ <u>S</u> <u>S</u> QE/D   | SGT <u>F</u> <u>S</u> Q    | 0.663 |
|      |              | QX <u>S</u> /TQE/D          |                            | 0.620 |

\*=polair amino acids

#### HPyV6

| residue | Protein kinase                      | Consensus motif             | Sequence in LTag           | score |
|---------|-------------------------------------|-----------------------------|----------------------------|-------|
| S20     | PKA                                 | K/RK/RX <u>S</u> /T         | LIGL <u>S</u> MACW         | 0.631 |
|         | CDK1                                | LPX <u>S</u> PXKK           |                            | 0.532 |
| T65     | PKC                                 | R/KR/KR/K/F <u>S</u> FRR    | KLNA <u>T</u> LRDQ         | 0.572 |
| S73     | ATM                                 | L/ <u>S</u> <u>S</u> QE/D   | QM <u>S</u> <u>S</u> SPTWC | 0.520 |
| T75     | PKC<br>CDK1                         | R/KR/KR/K/F <u>S</u> FRR    | SSSPT <u>W</u> CFS         | 0.661 |
|         |                                     | LPX <u>S</u> PXKK           |                            | 0.503 |
| S90     | p38 <sup>MAPK</sup><br>GSK3<br>CDK5 | PX <u>S</u> /TP             | PQYG <u>S</u> PGWE         | 0.538 |
|         |                                     | <u>S</u> /TXXX <u>S</u> /T  |                            | 0.508 |
|         |                                     | <u>S</u> /TPXK/H/R          |                            | 0.502 |
| Y110    | SRC                                 | EEDVY <u>G</u> XV           | DEDLY <u>C</u> DEH         | 0.546 |
| S116    | CKII                                | D/ED/ED/ES/ <u>T</u> D/ED/E | DEHL <u>S</u> ASEE         | 0.731 |
| S118    | CKII                                | D/ED/ED/ES/ <u>T</u> D/ED/E | HLSA <u>S</u> EEED         | 0.704 |
| S131    | ATM<br>DNAPK                        | L/ <u>S</u> <u>S</u> QE/D   | GEGN <u>S</u> QDSK         | 0.623 |
|         |                                     | QX <u>S</u> /TQE/D          |                            | 0.616 |
| T139    | CDK5<br>p38 <sup>MAPK</sup>         | <u>S</u> /TPXK/H/R          | KYSC <u>T</u> PPKK         | 0.583 |
|         |                                     | PX <u>S</u> /TP             |                            | 0.552 |
| T178    | CKII<br>CKI                         | D/ED/ED/ES/ <u>T</u> D/ED/E | FVSY <u>T</u> TLEK         | 0.594 |
|         |                                     | D/E(X)X <u>S</u> /T         |                            | 0.538 |
| T179    | CKI                                 | D/E(X)X <u>S</u> /T         | VSY <u>T</u> TLEKW         | 0.510 |
| T185    | DNAPK                               | QX <u>S</u> /TQE/D          | EKWE <u>T</u> LYDK         | 0.560 |
| Y187    | SRC                                 | EEDVY <u>G</u> XV           | WETLY <u>D</u> KLQ         | 0.505 |
| T199    | PKC                                 | R/KR/KR/K/F <u>S</u> FRR    | NAVFT <u>G</u> AYK         | 0.721 |
| T216    | p38 <sup>MAPK</sup><br>CDK5         | PX <u>S</u> /TP             | LYCI <u>T</u> PRRH         | 0.634 |
|         |                                     | <u>S</u> /TPXK/H/R          |                            | 0.531 |
| S223    | PKA                                 | K/RK/RX <u>S</u> /T         | RHRV <u>S</u> AMLN         | 0.721 |
| S246    | PKG                                 | R/KR/KX <u>S</u> /T         | AVLK <u>S</u> AECY         | 0.506 |
| S264    | CKII                                | D/ED/ED/ES/ <u>T</u> D/ED/E | VIQE <u>S</u> KAEG         | 0.581 |
| S271    | CKII<br>CDK1                        | D/ED/ED/ES/ <u>T</u> D/ED/E | EGLH <u>S</u> YDFQ         | 0.546 |
|         |                                     | LPX <u>S</u> PXKK           |                            | 0.503 |
| S278    | CKII<br>PKC                         | D/ED/ED/ES/ <u>T</u> D/ED/E | FQEG <u>S</u> KKEE         | 0.668 |
|         |                                     | R/KR/KR/K/F <u>S</u> FRR    |                            | 0.554 |
| S290    | PKC                                 | R/KR/KR/K/F <u>S</u> FRR    | NQVA <u>S</u> FASD         | 0.667 |
| T295    | CKII                                | D/ED/ED/ES/ <u>T</u> D/ED/E | FASD <u>T</u> DLTD         | 0.548 |
| S316    | PKC                                 | R/KR/KR/K/F <u>S</u> FRR    | NDPA <u>S</u> CMKC         | 0.714 |

|      |                      |                                                                               |                            |                         |
|------|----------------------|-------------------------------------------------------------------------------|----------------------------|-------------------------|
| S368 | PKC                  | R/KR/KR/K/F <u>S</u> FRR                                                      | LMLE <u>S</u> TRQD         | 0.595                   |
| T396 | CDK1                 | LPX <u>S</u> PXKK                                                             | GVEIT <u>Q</u> LLG         | 0.520                   |
| T413 | PKC                  | R/KR/KR/K/F <u>S</u> FRR                                                      | QPSFT <u>T</u> TKLK        | 0.791                   |
| T414 | CDK1                 | LPX <u>S</u> PXKK                                                             | PSFT <u>T</u> TKLKE        | 0.538                   |
| S421 | CKII                 | D/ED/ED/ES/ <u>T</u> D/ED/E                                                   | KEIL <u>S</u> ILTE         | 0.503                   |
| T424 | CKI                  | D/E(X) <u>X</u> S/ <u>T</u>                                                   | LSIL <u>T</u> ENIP         | 0.506                   |
| T445 | PKC                  | R/KR/KR/K/F <u>S</u> FRR                                                      | SGKT <u>T</u> LAAA         | 0.543                   |
| T464 | p38 <sup>MAPK</sup>  | PX <u>S</u> / <u>T</u> P                                                      | NVNC <u>I</u> PDKI         | 0.510                   |
| T489 | p38 <sup>MAPK</sup>  | PX <u>S</u> / <u>T</u> P                                                      | DVKG <u>T</u> PMAN         | 0.536                   |
| T497 | DNAPK                | QX <u>S</u> / <u>T</u> QE/D                                                   | NTNL <u>T</u> QGCG         | 0.579                   |
| T503 | CDK1                 | LPX <u>S</u> PXKK                                                             | GCGM <u>T</u> NLDN         | 0.517                   |
| T538 | PKG                  | R/KR/KX <u>S</u> / <u>T</u>                                                   | PSVIT <u>C</u> NEY         | 0.508                   |
| T547 | PKC                  | R/KR/KR/K/F <u>S</u> FRR                                                      | VIPCT <u>V</u> KAR         | 0.898                   |
| T575 | PKC                  | R/KR/KR/K/F <u>S</u> FRR                                                      | CVLM <u>S</u> KRLL         | 0.716                   |
| T583 | CDK1                 | LPX <u>S</u> PXKK                                                             | LQKG <u>T</u> TLLA         | 0.529                   |
| S618 | PKA                  | K/RK/RX <u>S</u> / <u>T</u>                                                   | ERWV <u>S</u> FGMY         | 0.716                   |
| T624 | PKC<br>CKII          | R/KR/KR/K/F <u>S</u> FRR<br>D/ED/ED/ES/ <u>T</u> D/ED/E                       | GMVQ <u>T</u> MKEN         | 0.781<br>0.536          |
| T637 | CKII                 | D/ED/ED/ES/ <u>T</u> D/ED/E                                                   | IDPF <u>T</u> INLV         | 0.513                   |
| T654 | CKII                 | D/ED/ED/ES/ <u>T</u> D/ED/E                                                   | ENDE <u>T</u> NDST         | 0.505                   |
| S657 | CKII                 | D/ED/ED/ES/ <u>T</u> D/ED/E                                                   | ETND <u>S</u> TQES         | 0.583                   |
| T658 | DNAPK<br>ATM<br>CDK1 | QX <u>S</u> / <u>T</u> QE/D<br>L/ <u>S</u> <u>S</u> QE/D<br>LPX <u>S</u> PXKK | TND <u>S</u> <u>T</u> QESG | 0.636<br>0.577<br>0.512 |
| S661 | CKI                  | D/E(X) <u>X</u> S/ <u>T</u>                                                   | STQ <u>E</u> SGIGS         | 0.510                   |
| S665 | DNAPK                | QX <u>S</u> / <u>T</u> QE/D                                                   | SGIG <u>S</u> MHSM         | 0.518                   |

#### HPyV7

| residue | Protein kinase                      | Consensus motif                                                                      | Sequence in LTag   | score                   |
|---------|-------------------------------------|--------------------------------------------------------------------------------------|--------------------|-------------------------|
| S38     | PKC<br>PKA                          | R/KR/KR/K/F <u>S</u> FRR<br>K/RK/RX <u>S</u> / <u>T</u>                              | VRLASKKYH          | 0.921<br>0.508          |
| S73     | RSK<br>p38 <sup>MAPK</sup>          | RXR <u>X</u> S/ <u>T</u><br>PX <u>S</u> / <u>T</u> P                                 | QRSG <u>S</u> PMWH | 0.537<br>0.500          |
| S79     | CKII                                | D/ED/ED/ES/ <u>T</u> D/ED/E                                                          | MWHY <u>S</u> SDEV | 0.572                   |
| S80     | CKII                                | D/ED/ED/ES/ <u>T</u> D/ED/E                                                          | WHY <u>S</u> SDEVR | 0.504                   |
| S91     | CDK5<br>p38 <sup>MAPK</sup><br>GSK3 | <u>S</u> / <u>T</u> PXK/H/R<br>PX <u>S</u> / <u>T</u> P<br><u>S</u> / <u>T</u> XXS/T | PPYG <u>S</u> PAWD | 0.587<br>0.524<br>0.508 |
| Y110    | SRC                                 | EEDVY <u>G</u> XV                                                                    | DEDLY <u>C</u> TEE | 0.539                   |
| T112    | CKII                                | D/ED/ED/ES/ <u>T</u> D/ED/E                                                          | DLYC <u>T</u> EELS | 0.564                   |
| S116    | CKII                                | D/ED/ED/ES/ <u>T</u> D/ED/E                                                          | TEEL <u>S</u> SSDE | 0.708                   |
| S117    | CKII                                | D/ED/ED/ES/ <u>T</u> D/ED/E                                                          | EEL <u>S</u> SSDEE | 0.753                   |
| S118    | CKII<br>CDK1                        | D/ED/ED/ES/ <u>T</u> D/ED/E<br>LPX <u>S</u> PXKK                                     | EL <u>S</u> SSDEEE | 0.733<br>0.510          |
| S136    | ATM<br>DNAPK                        | L/ <u>S</u> <u>S</u> QE/D<br>QX <u>S</u> / <u>T</u> QE/D                             | EEGC <u>S</u> QDSK | 0.598<br>0.531          |
| S142    | PKC                                 | R/KR/KR/K/F <u>S</u> FRR                                                             | DSKY <u>S</u> ATPP | 0.515                   |
| T144    | p38 <sup>MAPK</sup><br>CDK5         | PX <u>S</u> / <u>T</u> P<br><u>S</u> / <u>T</u> PXK/H/R                              | KYSAT <u>P</u> PKQ | 0.549<br>0.543          |
| S163    | CKII                                | D/ED/ED/ES/ <u>T</u> D/ED/E                                                          | PECL <u>S</u> EFLS | 0.505                   |
| T183    | CKII                                | D/ED/ED/ES/ <u>T</u> D/ED/E                                                          | FLCY <u>T</u> TYEK | 0.505                   |
| Y207    | EGFR                                | XXEY <u>Y</u> YXX                                                                    | FIGAY <u>N</u> CV  | 0.523                   |
| S213    | PKA                                 | K/RK/RX <u>S</u> / <u>T</u>                                                          | CVDS <u>G</u> ALV  | 0.568                   |
| S221    | CDK1                                | LPX <u>S</u> PXKK                                                                    | VFFI <u>S</u> GSRH | 0.523                   |

|      |                     |                                                            |                     |                |
|------|---------------------|------------------------------------------------------------|---------------------|----------------|
| S223 | PKC<br>CDK1         | R/KR/KR/K/F <u>S</u> FRR<br>LPX <u>S</u> PXKK              | FISG <u>S</u> RHRV  | 0.698<br>0.546 |
| S228 | PKA                 | K/RK/RX <u>S</u> / <u>T</u>                                | RHRV <u>S</u> AILN  | 0.732          |
| T239 | PKC                 | R/KR/KR/K/F <u>S</u> FRR                                   | KKHCTV <u>S</u> FI  | 0.505          |
| S241 | PKC                 | R/KR/KR/K/F <u>S</u> FRR                                   | HCTV <u>S</u> FIMV  | 0.850          |
| S276 | CKII<br>CDK1        | D/ED/ED/ES/ <u>T</u> D/ED/E<br>LPX <u>S</u> PXKK           | GGLHSYDFQ           | 0.560<br>0.533 |
| S283 | PKC                 | R/KR/KR/K/F <u>S</u> FRR                                   | FQEAS <u>K</u> KDD  | 0.518          |
| T303 | CKII                | D/ED/ED/ES/ <u>T</u> D/ED/E                                | DMEL <u>T</u> DVLL  | 0.507          |
| S328 | PKC                 | R/KR/KR/K/F <u>S</u> FRR                                   | KCLK <u>S</u> VKAH  | 0.913          |
| T347 | PKC                 | R/KR/KR/K/F <u>S</u> FRR                                   | KLKFTAKNQ           | 0.780          |
| S373 | PKC                 | R/KR/KR/K/F <u>S</u> FRR                                   | LMME <u>S</u> TRKD  | 0.571          |
| S382 | PKC                 | R/KR/KR/K/F <u>S</u> FRR                                   | LMVM <u>S</u> FKKQ  | 0.753          |
| T401 | CDK1                | LPX <u>S</u> PXKK                                          | GVEIT <u>Q</u> LIG  | 0.524          |
| S426 | CKII                | D/ED/ED/ES/ <u>T</u> D/ED/E                                | KEML <u>S</u> YLVE  | 0.525          |
| Y427 | INSR                | <u>Y</u> XXM                                               | EMLS <u>Y</u> LVEN  | 0.500          |
| T450 | PKC                 | R/KR/KR/K/F <u>S</u> FRR                                   | SGKT <u>T</u> LAAA  | 0.543          |
| S470 | PKC                 | R/KR/KR/K/F <u>S</u> FRR                                   | VNC <u>S</u> SDKIN  | 0.611          |
| T494 | p38 <sup>MAPK</sup> | PX <u>S</u> / <u>T</u> P                                   | DVKGT <u>I</u> PLPN | 0.524          |
| T533 | PKC                 | R/KR/KR/K/F <u>S</u> FRR                                   | HINK <u>T</u> SQLF  | 0.734          |
| S534 | CDK1                | LPX <u>S</u> PXKK                                          | INK <u>T</u> SQLF   | 0.542          |
| T543 | PKG<br>CKII         | R/KR/KX <u>S</u> / <u>T</u><br>D/ED/ED/ES/ <u>T</u> D/ED/E | PCIIT <u>C</u> NEY  | 0.609<br>0.521 |
| Y547 | INSR                | <u>Y</u> XXM                                               | TCNEY <u>A</u> IPT  | 0.502          |
| T551 | PKC                 | R/KR/KR/K/F <u>S</u> FRR                                   | YAIPT <u>T</u> VKA  | 0.621          |
| T552 | PKC                 | R/KR/KR/K/F <u>S</u> FRR                                   | AIPT <u>T</u> VKAR  | 0.861          |
| S602 | CKII                | D/ED/ED/ES/ <u>T</u> D/ED/E                                | WEPV <u>S</u> DFVE  | 0.645          |
| S624 | PKC                 | R/KR/KR/K/F <u>S</u> FRR                                   | EQWV <u>S</u> YGMF  | 0.543          |
| S630 | PKC                 | R/KR/KR/K/F <u>S</u> FRR                                   | GMFQ <u>T</u> MKEN  | 0.692          |
| S637 | PKC                 | R/KR/KR/K/F <u>S</u> FRR                                   | ENIL <u>S</u> GKDP  | 0.506          |
| S655 | CKII                | D/ED/ED/ES/ <u>T</u> D/ED/E                                | TEENT <u>R</u> ETQ  | 0.507          |
| T658 | DNAPK               | QX <u>S</u> / <u>T</u> QE/D                                | NTRET <u>Q</u> EST  | 0.617          |
| S661 | CKI                 | D/E(X)X <u>S</u> / <u>T</u>                                | ETQEST <u>E</u> SG  | 0.593          |
| T662 | CKI                 | D/E(X)X <u>S</u> / <u>T</u>                                | TQEST <u>E</u> SGI  | 0.530          |
| S664 | CKI<br>CDK1         | D/E(X)X <u>S</u> / <u>T</u><br>LPX <u>S</u> PXKK           | ESTESGIGS           | 0.600<br>0.508 |
| S668 | DNAPK               | QX <u>S</u> / <u>T</u> QE/D                                | SGIG <u>S</u> MNN   | 0.599          |

#### TSPyV

| residue | Protein kinase | Consensus motif                                            | Sequence in LTag   | score          |
|---------|----------------|------------------------------------------------------------|--------------------|----------------|
| S6      | CKII<br>CKI    | D/ED/ED/ES/ <u>T</u> D/ED/E<br>D/E(X)X <u>S</u> / <u>T</u> | DKFL <u>S</u> REES | 0.598<br>0.577 |
| S10     | PKA<br>DNAPK   | K/RK/RX <u>S</u> / <u>T</u><br>QX <u>S</u> / <u>T</u> QE/D | SREES <u>L</u> ELM | 0.660<br>0.503 |
| S38     | PKC<br>PKA     | R/KR/KR/K/F <u>S</u> FRR<br>K/RK/RX <u>S</u> / <u>T</u>    | HKKM <u>S</u> LKYH | 0.921<br>0.565 |
| S53     | PKA            | K/RK/RX <u>S</u> / <u>T</u>                                | PEKM <u>S</u> RLNQ | 0.611          |
| Y67     | EGFR<br>SRC    | XXEXY <u>Y</u> YXX<br>EEDV <u>Y</u> GXV                    | QEGY <u>N</u> ARQ  | 0.629<br>0.513 |
| S76     | CDK1           | LPX <u>S</u> PXKK                                          | EFPT <u>S</u> FSSQ | 0.519          |
| S79     | ATM<br>DNAPK   | L/ <u>S</u> QE/D<br>QX <u>S</u> / <u>T</u> QE/D            | TSF <u>S</u> QHDV  | 0.602<br>0.571 |

|      |                                     |                    |            |       |
|------|-------------------------------------|--------------------|------------|-------|
|      | CKI                                 | D/E(X)XS/T         |            | 0.549 |
| T85  | DNAPK                               | QXS/TQE/D          | HDVPTQDGR  | 0.552 |
| S98  | PKA                                 | K/RK/RXS/T         | YGHP\$WASW | 0.502 |
| S127 | CKII                                | D/ED/ED/ES/TD/ED/E | FCHE\$TIPS | 0.514 |
| S136 | CDK5<br>p38 <sup>MAPK</sup><br>GSK3 | S/TPXK/H/R         | DESR\$PSPT | 0.539 |
|      |                                     | PXS/TP             |            | 0.521 |
|      |                                     | S/TXXXS/T          |            | 0.502 |
| S138 | CDK5<br>GSK3<br>p38 <sup>MAPK</sup> | S/TPXK/H/R         | SRSP\$PTPG | 0.725 |
|      |                                     | S/TXXXS/T          |            | 0.520 |
|      |                                     | PXS/TP             |            | 0.503 |
| T140 | CDK5<br>GSK3                        | S/TPXK/H/R         | SPSPTPGPS  | 0.651 |
|      |                                     | S/TXXXS/T          |            | 0.540 |
| T145 | ATM                                 | L/\$SQE/D          | PGP\$TQFSE | 0.553 |
| S163 | GSK3                                | S/TXXXS/T          | PPED\$PGCT | 0.503 |
| S170 | PKC                                 | R/KR/KR/K/\$F\$FRR | CTQ\$SFSAT | 0.552 |
| T174 | CDK5<br>p38 <sup>MAPK</sup>         | S/TPXK/H/R         | SFSATPPKP  | 0.699 |
|      |                                     | PXS/TP             |            | 0.567 |
| S181 | PKG<br>PKA                          | R/KR/KXS/T         | KPKK\$KYDS | 0.637 |
|      |                                     | K/RK/RXS/T         |            | 0.525 |
| S209 | PKA                                 | K/RK/RXS/T         | NKTL\$SFLI | 0.542 |
| S210 | PKC<br>PKA                          | R/KR/KR/K/\$F\$FRR | KTL\$SFLIY | 0.752 |
|      |                                     | K/RK/RXS/T         |            | 0.502 |
| T215 | CKII                                | D/ED/ED/ES/TD/ED/E | FLIYTNEK   | 0.584 |
| T216 | CDK1<br>CKII                        | LPX\$PXKK          | LIYTNEKA   | 0.538 |
|      |                                     | D/ED/ED/ES/TD/ED/E |            | 0.533 |
| S239 | PKA                                 | K/RK/RXS/T         | KSRH\$FQEG | 0.625 |
| T250 | p38 <sup>MAPK</sup><br>CDK5         | PXS/TP             | VFLMTPGKH  | 0.628 |
|      |                                     | S/TPXK/H/R         |            | 0.589 |
| S257 | PKA                                 | K/RK/RXS/T         | KHRV\$AIKN | 0.715 |
| S270 | PKC                                 | R/KR/KR/K/\$F\$FRR | HCTV\$FLIC | 0.745 |
| S298 | CKI                                 | D/E(X)XS/T         | LLEE\$KPGI | 0.566 |
| T322 | PKC                                 | R/KR/KR/K/\$F\$FRR | WNLLTDFAV  | 0.595 |
| S351 | PKC                                 | R/KR/KR/K/\$F\$FRR | PSIC\$KCTK | 0.654 |
| T354 | PKC                                 | R/KR/KR/K/\$F\$FRR | CSKCTKKAL  | 0.908 |
| T380 | PKC                                 | R/KR/KR/K/\$F\$FRR | KECKTQKTA  | 0.524 |
| T383 | PKG                                 | R/KR/KXS/T         | KTQKTACQQ  | 0.539 |
| S403 | PKC                                 | R/KR/KR/K/\$F\$FRR | KLIE\$TRKE | 0.759 |
| T421 | CKII                                | D/ED/ED/ES/TD/ED/E | FEKLIDEFG  | 0.527 |
| S440 | CKII                                | D/ED/ED/ES/TD/ED/E | VAWYSCLFE  | 0.515 |
| T479 | PKC                                 | R/KR/KR/K/\$F\$FRR | SGKTTFAAA  | 0.704 |
| S537 | CDK1                                | LPX\$PXKK          | GQGV\$NLDN | 0.532 |
| S549 | PKC                                 | R/KR/KR/K/\$F\$FRR | HLDG\$VKVD | 0.870 |
| S563 | PKG                                 | R/KR/KXS/T         | VNKR\$QIFP | 0.514 |
| T572 | PKG                                 | R/KR/KXS/T         | PCLVTMNEY  | 0.565 |
| T593 | p38 <sup>MAPK</sup><br>CDK1         | PXS/TP             | VLNFTPKHN  | 0.577 |
|      |                                     | LPX\$PXKK          |            | 0.511 |
| S600 | PKC                                 | R/KR/KR/K/\$F\$FRR | HNLRSCLQV  | 0.622 |
| S605 | PKA<br>CKII                         | K/RK/RXS/T         | CLQV\$DYLL | 0.649 |
|      |                                     | D/ED/ED/ES/TD/ED/E |            | 0.510 |
| Y607 | EGFR                                | XXEXYYXX           | QVSDYLLTE  | 0.583 |
| T610 | PKC                                 | R/KR/KR/K/\$F\$FRR | DYLLTERIL  | 0.534 |
| S636 | CKII                                | D/ED/ED/ES/TD/ED/E | MFSE\$IKED | 0.575 |
| Y643 | INSR                                | YXXM               | EDVKYWKDI  | 0.511 |
| S687 | CKII<br>CKI                         | D/ED/ED/ES/TD/ED/E | EEEF\$ETND | 0.610 |
|      |                                     | D/E(X)XS/T         |            | 0.603 |

|      |      |                    |                    |       |
|------|------|--------------------|--------------------|-------|
| S689 | CKII | D/ED/ED/ES/TD/ED/E | EFSE <u>T</u> NDSG | 0.530 |
| S696 | ATM  | L/SSQE/D           | SGFQT <u>Q</u>     | 0.523 |

# HPyV9

| residue | Protein kinase                     | Consensus motif                                                   | Sequence in LTA <sub>g</sub> | score                            |
|---------|------------------------------------|-------------------------------------------------------------------|------------------------------|----------------------------------|
| S6      | CKII<br>DNAPK                      | D/ED/ED/ES/TD/ED/E<br>QXS/TQE/D                                   | DQTL <u>S</u> LEEK           | 0.622<br>0.505                   |
| S28     | PKC                                | R/KR/KR/K/F <u>S</u> FRR                                          | WGNL <u>S</u> LMKK           | 0.521                            |
| Y34     | EGFR                               | XXE <u>X</u> Y <u>Y</u> YXX                                       | MKKAY <u>K</u> TVS           | 0.515                            |
| T36     | PKC                                | R/KR/KR/K/F <u>S</u> FRR                                          | KAYK <u>T</u> VSKI           | 0.831                            |
| S38     | PKC                                | R/KR/KR/K/F <u>S</u> FRR                                          | YKTV <u>S</u> KIYH           | 0.837                            |
| S75     | PKC                                | R/KR/KR/K/F <u>S</u> FRR                                          | SNCG <u>S</u> SSSQ           | 0.590                            |
| S76     | CDK1                               | LPX <u>S</u> PXKK                                                 | NCG <u>S</u> SSQG            | 0.607                            |
| S77     | CDK1                               | LPX <u>S</u> PXKK                                                 | CGSS <u>S</u> SQGY           | 0.503                            |
| S78     | ATM<br>DNAPK<br>CDK1<br>CKI        | L/SSQE/D<br>QXS/TQE/D<br>LPX <u>S</u> PXKK<br>D/E(X)XS/T          | GSS <u>S</u> SQGY            | 0.640<br>0.627<br>0.546<br>0.504 |
| S83     | CDK1<br>CKII<br>PKG                | LPX <u>S</u> PXKK<br>D/ED/ED/ES/TD/ED/E<br>R/KR/KXS/T             | QGY <u>S</u> DSPY            | 0.544<br>0.508<br>0.504          |
| S85     | CDK1                               | LPX <u>S</u> PXKK                                                 | YYSD <u>S</u> PYFT           | 0.558                            |
| T91     | CDK5<br>p38 <sup>MAPK</sup>        | <u>S</u> /TPXK/H/R<br>PXS/ <u>T</u> P                             | YFTE <u>T</u> PFSY           | 0.613<br>0.561                   |
| S94     | CKII                               | D/ED/ED/ES/TD/ED/E                                                | ETPF <u>S</u> YCER           | 0.547                            |
| S130    | CKII                               | D/ED/ED/ES/TD/ED/E                                                | SETI <u>S</u> SSDD           | 0.627                            |
| S131    | CKII                               | D/ED/ED/ES/TD/ED/E                                                | ETI <u>S</u> SSDDE           | 0.620                            |
| S132    | CKII                               | D/ED/ED/ES/TD/ED/E                                                | TISS <u>S</u> DDEN           | 0.710                            |
| S149    | CKII                               | D/ED/ED/ES/TD/ED/E                                                | PSSA <u>S</u> ASED           | 0.510                            |
| S151    | CKII                               | D/ED/ED/ES/TD/ED/E                                                | SASA <u>S</u> EDPD           | 0.624                            |
| S163    | DNAPK<br>CDK1<br>ATM               | QXS/TQE/D<br>LPX <u>S</u> PXKK<br>L/SSQE/D                        | EAGS <u>S</u> QSSF           | 0.614<br>0.559<br>0.520          |
| S166    | CKI                                | D/E(X)XS/T                                                        | SSQS <u>S</u> FTCT           | 0.545                            |
| T168    | PKC                                | R/KR/KR/K/F <u>S</u> FRR                                          | QSS <u>F</u> ICTPP           | 0.585                            |
| T170    | CDK5<br>PKC<br>p38 <sup>MAPK</sup> | <u>S</u> /TPXK/H/R<br>R/KR/KR/K/F <u>S</u> FRR<br>PXS/ <u>T</u> P | SFTC <u>T</u> PPKR           | 0.759<br>0.626<br>0.551          |
| T181    | CDK5<br>GSK3                       | <u>S</u> /TPXK/H/R<br><u>S</u> /TXXS/T                            | PEPNT <u>T</u> PEDF          | 0.548<br>0.516                   |
| S199    | PKC                                | R/KR/KR/K/F <u>S</u> FRR                                          | HAIYSNKT <u>M</u>            | 0.688                            |
| T210    | CKII                               | D/ED/ED/ES/TD/ED/E                                                | FLIY <u>T</u> TVEK           | 0.514                            |
| T211    | PKC                                | R/KR/KR/K/F <u>S</u> FRR                                          | LIYT <u>T</u> VEKS           | 0.792                            |
| T221    | PKC                                | R/KR/KR/K/F <u>S</u> FRR                                          | QLYR <u>T</u> VEKS           | 0.822                            |
| S258    | PKA<br>PKG                         | K/RK/RXS/T<br>R/KR/KXS/T                                          | KHRV <u>S</u> AVKH           | 0.655<br>0.532                   |
| S271    | PKC                                | R/KR/KR/K/F <u>S</u> FRR                                          | QCTF <u>S</u> FIHC           | 0.794                            |
| T331    | PKA                                | K/RK/RXS/T                                                        | EAKI <u>T</u> DVLL           | 0.531                            |
| S351    | PKC                                | R/KR/KR/K/F <u>S</u> FRR                                          | PGTC <u>S</u> KCEK           | 0.667                            |
| S357    | PKC<br>PKG                         | R/KR/KR/K/F <u>S</u> FRR<br>R/KR/KXS/T                            | CEKK <u>S</u> HKFH           | 0.664<br>0.560                   |
| S378    | PKC                                | R/KR/KR/K/F <u>S</u> FRR                                          | LFLE <u>S</u> KSQK           | 0.619                            |
| S380    | ATM                                | L/SSQE/D                                                          | LESK <u>S</u> QKNI           | 0.512                            |
| T404    | CKII                               | D/ED/ED/ES/TD/ED/E                                                | LVECT <u>R</u> MEL           | 0.543                            |

|      |                     |                              |                        |       |
|------|---------------------|------------------------------|------------------------|-------|
|      | PKA                 | K/RK/RXS/T                   |                        | 0.516 |
| S435 | PKA                 | K/RK/RXS/T                   | LRWMSGVAW              | 0.818 |
|      | CDK1                | LPXSPXKK                     |                        | 0.512 |
| T459 | PKC                 | R/KR/KR/K/F <sub>S</sub> FRR | LQLVTTSQP              | 0.752 |
| T460 | PKC                 | R/KR/KR/K/F <sub>S</sub> FRR | QLVTTSQPK              | 0.533 |
| S461 | DNAPK               | QXS/TQE/D                    | LVTTSQPKK              | 0.631 |
| S476 | PKA                 | K/RK/RXS/T                   | GPINSGKTT              | 0.532 |
| T480 | PKC                 | R/KR/KR/K/F <sub>S</sub> FRR | SGKTTLASA              | 0.512 |
| S550 | PKC                 | R/KR/KR/K/F <sub>S</sub> FRR | HLDGTIKVN              | 0.873 |
| S564 | PKG                 | R/KR/KXS/T                   | VNKR <sub>S</sub> QIFP | 0.514 |
| T573 | PKG                 | R/KR/KXS/T                   | PVIMTMNEY              | 0.593 |
|      | DNAPK               | QXS/TQE/D                    |                        | 0.509 |
| T597 | PKC                 | R/KR/KR/K/F <sub>S</sub> FRR | FHCKTYLKQ              | 0.700 |
| S606 | CKII                | D/ED/ED/ES/TD/ED/E           | SLEKSDLIE              | 0.552 |
|      | CDK1                | LPXSPXKK                     |                        | 0.531 |
| S616 | PKA                 | K/RK/RXS/T                   | RILNSGYTI              | 0.768 |
| Y618 | EGFR                | XXEXYYXX                     | LNSGYTILL              | 0.512 |
| T634 | p38 <sup>MAPK</sup> | PXS/TP                       | VDSFTPQVQ              | 0.519 |
| S653 | PKA                 | K/RK/RXS/T                   | ERHV <sub>S</sub> ITQF | 0.730 |
| T655 | ATM                 | L/SSQE/D                     | HVSITQFGN              | 0.534 |

#### HPyV10

| residue | Protein kinase      | Consensus motif              | Sequence in LTag        | score |
|---------|---------------------|------------------------------|-------------------------|-------|
| S6      | CKII                | D/ED/ED/ES/TD/ED/E           | DRVLSRDEV               | 0.576 |
|         | RSK                 | RXRXXS/T                     |                         | 0.540 |
|         | CKI                 | D/E(X)XS/T                   |                         | 0.502 |
| T37     | PKC                 | R/KR/KR/K/F <sub>S</sub> FRR | KYROTCLKL               | 0.696 |
| S60     | PKC                 | R/KR/KR/K/F <sub>S</sub> FRR | NELFSKMYT               | 0.531 |
| Y63     | INSR                | YXXM                         | FSKMYTTIE               | 0.522 |
| T64     | PKC                 | R/KR/KR/K/F <sub>S</sub> FRR | SKMYTTIEK               | 0.639 |
| Y76     | SRC                 | EEDVYGXV                     | EGEVYFPAK               | 0.516 |
| Y85     | EGFR                | XXEXYYXX                     | GNPTYGTPE               | 0.573 |
|         | SRC                 | EEDVYGXV                     |                         | 0.523 |
| T87     | p38 <sup>MAPK</sup> | PXS/TP                       | PTYGTPEWD               | 0.530 |
| S106    | CKII                | D/ED/ED/ES/TD/ED/E           | DEDLSCNES               | 0.539 |
| S114    | CKII                | D/ED/ED/ES/TD/ED/E           | SFAPSD <sub>S</sub> EEE | 0.726 |
| S122    | DNAPK               | QXS/TQE/D                    | EPGPSQSAS               | 0.575 |
| S124    | CDK1                | LPXSPXKK                     | GPSQSASQT               | 0.500 |
| S126    | DNAPK               | QXS/TQE/D                    | SQSASQTAN               | 0.625 |
| T134    | PKC                 | R/KR/KR/K/F <sub>S</sub> FRR | NDTNTPKKR               | 0.808 |
|         | p38 <sup>MAPK</sup> | PXS/TP                       |                         | 0.518 |
| S142    | PKA                 | K/RK/RXS/T                   | RPRESSSNS               | 0.805 |
| S143    | PKB                 | RXRXX*XS/TF/L                | PRESSNST                | 0.771 |
|         | RSK                 | RXRXXS/T                     |                         | 0.541 |
| S146    | CKI                 | D/E(X)XS/T                   | SSSNSTCTP               | 0.559 |
|         | CDK1                | LPXSPXKK                     |                         | 0.511 |
| T147    | PKC                 | R/KR/KR/K/F <sub>S</sub> FRR | SSNSTCTPP               | 0.605 |
| T149    | CDK5                | S/TPXK/H/R                   | NSTCTPPKR               | 0.645 |
|         | p38 <sup>MAPK</sup> | PXS/TP                       |                         | 0.621 |
| S182    | PKA                 | K/RK/RXS/T                   | KTLN <sub>S</sub> FVLY  | 0.583 |
|         | PKC                 | R/KR/KR/K/F <sub>S</sub> FRR |                         | 0.513 |

|      |                     |                           |                     |       |
|------|---------------------|---------------------------|---------------------|-------|
| T187 | PKC                 | R/KR/KR/K/F <u>S</u> FRR  | FVLYT <u>T</u> TREK | 0.872 |
| S209 | PKA                 | K/RK/RX <u>S</u> /T       | AMFY <u>S</u> LHEF  | 0.598 |
|      | PKG                 | R/KR/KX <u>S</u> /T       |                     | 0.544 |
|      | CKII                | D/ED/ED/ES/TD/ED/E        |                     | 0.512 |
| S217 | PKA                 | K/RK/RX <u>S</u> /T       | FDGD <u>S</u> LLFG  | 0.645 |
|      | CDK1                | LPX <u>S</u> PXKK         |                     | 0.557 |
| S224 | PKC                 | R/KR/KR/K/F <u>S</u> FRR  | FLL <u>S</u> SGKHR  | 0.772 |
| S230 | PKA                 | K/RK/RX <u>S</u> /T       | KHRV <u>S</u> AIKN  | 0.653 |
|      | PKG                 | R/KR/KX <u>S</u> /T       |                     | 0.583 |
|      | CDK1                | LPX <u>S</u> PXKK         |                     | 0.570 |
| T263 | CDK5                | <u>S</u> /TPXK/H/R        | ALCKT <u>P</u> FKL  | 0.555 |
|      | p38 <sup>MAPK</sup> | PX <u>S</u> /T <u>P</u>   |                     | 0.503 |
| S271 | ATM                 | L/ <u>S</u> <u>S</u> QE/D | LIKQ <u>S</u> QEHG  | 0.602 |
|      | DNAPK               | QX <u>S</u> /TQE/D        |                     | 0.574 |
|      | PKA                 | K/RK/RX <u>S</u> /T       |                     | 0.523 |
| T279 | CKII                | D/ED/ED/ES/TD/ED/E        | GLSKT <u>D</u> FCF  | 0.648 |
| S325 | CKII                | D/ED/ED/ES/TD/ED/E        | VEGC <u>S</u> KCEQ  | 0.549 |
| S377 | PKC                 | R/KR/KR/K/F <u>S</u> FRR  | LILE <u>S</u> TREH  | 0.655 |
| T378 | CDK1                | LPX <u>S</u> PXKK         | ILE <u>S</u> TREHL  | 0.517 |
| T432 | PKC                 | R/KR/KR/K/F <u>S</u> FRR  | IKAMT <u>E</u> NVP  | 0.511 |
| T453 | PKC                 | R/KR/KR/K/F <u>S</u> FRR  | SGKT <u>T</u> VAAA  | 0.711 |
| S504 | DNAPK               | QX <u>S</u> /TQE/D        | GSNS <u>S</u> LLTPG | 0.562 |
|      | CKI                 | D/E(X)X <u>S</u> /T       |                     | 0.543 |
| T506 | p38 <sup>MAPK</sup> | PX <u>S</u> /T <u>P</u>   | NSSLT <u>P</u> GMG  | 0.549 |
| S512 | CDK1                | LPX <u>S</u> PXKK         | GMGMS <u>N</u> LDN  | 0.525 |
| T547 | PKG                 | R/KR/KX <u>S</u> /T       | PGIIT <u>M</u> NDY  | 0.537 |
| Y551 | INSR                | <u>Y</u> XXM              | TMNDY <u>F</u> IPP  | 0.505 |
| T564 | PKC                 | R/KR/KR/K/F <u>S</u> FRR  | RMIKT <u>I</u> NFR  | 0.669 |
| S576 | DNAPK               | QX <u>S</u> /TQE/D        | FLRN <u>S</u> LEKN  | 0.574 |
| S591 | PKA                 | K/RK/RX <u>S</u> /T       | RIVQ <u>S</u> GVTL  | 0.763 |
| T659 | DNAPK               | QX <u>S</u> /TQE/D        | ADEDT <u>Q</u> QDS  | 0.501 |
| S667 | ATM                 | L/ <u>S</u> <u>S</u> QE/D | SGIN <u>S</u> Q     | 0.660 |
|      | DNAPK               | QX <u>S</u> /TQE/D        |                     | 0.649 |
|      | CKII                | D/ED/ED/ES/TD/ED/E        |                     | 0.507 |

#### STLPyV

| residue | Protein kinase      | Consensus motif          | Sequence in LTA <sub>g</sub> | score |
|---------|---------------------|--------------------------|------------------------------|-------|
| S6      | PKC                 | R/KR/KR/K/F <u>S</u> FRR | DQAL <u>S</u> RAEA           | 0.659 |
|         | CKII                | D/ED/ED/ES/TD/ED/E       |                              | 0.622 |
| S23     | PKA                 | K/RK/RX <u>S</u> /T      | LPED <u>S</u> WGNV           | 0.517 |
| S31     | PKC                 | R/KR/KR/K/F <u>S</u> FRR | VPLI <u>S</u> YRYR           | 0.832 |
| S38     | PKB                 | RXR*X <u>S</u> /TF/L     | YRQK <u>S</u> KIYH           | 0.806 |
|         | PKC                 | R/KR/KR/K/F <u>S</u> FRR |                              | 0.745 |
|         | RSK                 | RXRXX <u>S</u> /T        |                              | 0.580 |
|         | PKG                 | R/KR/KX <u>S</u> /T      |                              | 0.575 |
| S71     | CKII                | D/ED/ED/ES/TD/ED/E       | QNLRS <u>S</u> SEN           | 0.553 |
|         | CDK1                | LPX <u>S</u> PXKK        |                              | 0.537 |
| S72     | PKA                 | K/RK/RX <u>S</u> /T      | NLR <u>S</u> SENE            | 0.615 |
|         | CDK1                | LPX <u>S</u> PXKK        |                              | 0.524 |
| S73     | RSK                 | RXRXX <u>S</u> /T        | LR <u>S</u> SENE             | 0.519 |
| T87     | p38 <sup>MAPK</sup> | PX <u>S</u> /T <u>P</u>  | GQYGT <u>P</u> AWE           | 0.561 |
| T106    | CKII                | D/ED/ED/ES/TD/ED/E       | EDDLT <u>C</u> NES           | 0.624 |
| S114    | CKII                | D/ED/ED/ES/TD/ED/E       | SFNC <u>S</u> DDEG           | 0.715 |
| S122    | PKC                 | R/KR/KR/K/F <u>S</u> FRR | GTSAS <u>Q</u> KRK           | 0.876 |



|      |                      |                                                                  |                         |                         |
|------|----------------------|------------------------------------------------------------------|-------------------------|-------------------------|
|      | DNAPK<br>CDK1        | QXS/TQE/D<br>LPXSPXKK                                            |                         | 0.573<br>0.515          |
| S130 | PKC                  | R/KR/KR/K/F <sub>S</sub> FRR                                     | KFPD <sub>S</sub> STQN  | 0.512                   |
| T132 | DNAPK<br>PKC         | QXS/TQE/D<br>R/KR/KR/K/F <sub>S</sub> FRR                        | PDSSTQNST               | 0.608<br>0.563          |
| S135 | PKC                  | R/KR/KR/K/F <sub>S</sub> FRR                                     | STQNSTPPK               | 0.641                   |
| T136 | CDK5                 | S/TPXK/H/R                                                       | TQNSTPPKK               | 0.585                   |
| S163 | PKC                  | R/KR/KR/K/F <sub>S</sub> FRR                                     | HAVF <sub>S</sub> NKTS  | 0.812                   |
| Y173 | INSR                 | YXXM                                                             | CFCIYT <sub>T</sub> IE  | 0.518                   |
| T174 | PKC<br>CKII<br>PKG   | R/KR/KR/K/F <sub>S</sub> FRR<br>D/ED/ED/ES/TD/ED/E<br>R/KR/KXS/T | FCIYT <sub>T</sub> IEK  | 0.586<br>0.529<br>0.503 |
| Y183 | INSR                 | YXXM                                                             | GNELYTVIG               | 0.509                   |
| T184 | PKC<br>CDK1          | R/KR/KR/K/F <sub>S</sub> FRR<br>LPXSPXKK                         | NELYTVIGP               | 0.655<br>0.526          |
| S196 | PKA                  | K/RK/RXS/T                                                       | SMFI <sub>S</sub> CHSY  | 0.516                   |
| S217 | PKA<br>PKG           | K/RK/RXS/T<br>R/KR/KXS/T                                         | KHRV <sub>S</sub> ALKN  | 0.596<br>0.505          |
| S249 | RSK<br>PKA           | RXRXS/T<br>K/RK/RXS/T                                            | YRLCSAPFA               | 0.537<br>0.516          |
| T255 | PKC                  | R/KR/KR/K/F <sub>S</sub> FRR                                     | PFAVT <sub>K</sub> QSR  | 0.795                   |
| S258 | PKG<br>PKA           | R/KR/KXS/T<br>K/RK/RXS/T                                         | VTQ <sub>S</sub> SRPEG  | 0.562<br>0.547          |
| S264 | DNAPK<br>CKII<br>ATM | QXS/TQE/D<br>D/ED/ED/ES/TD/ED/E<br>L/SSQE/D                      | PEGL <sub>S</sub> QAEF  | 0.586<br>0.580<br>0.575 |
| S277 | PKC                  | R/KR/KR/K/F <sub>S</sub> FRR                                     | NSKPSVNWQ               | 0.540                   |
| S306 | CKII                 | D/ED/ED/ES/TD/ED/E                                               | YLD <sub>F</sub> SESPE  | 0.508                   |
| S308 | CKI<br>CKII          | D/E(X)XS/T<br>D/ED/ED/ES/TD/ED/E                                 | DFSE <sub>S</sub> PENC  | 0.546<br>0.527          |
| T317 | PKC                  | R/KR/KR/K/F <sub>S</sub> FRR                                     | EKCKT <sub>E</sub> ELKH | 0.546                   |
| S323 | ATM                  | L/SSQE/D                                                         | LKHHS <sub>S</sub> QFHE | 0.512                   |
| Y330 | EGFR<br>SRC          | XXEY <sub>Y</sub> YXX<br>EEDVY <sub>G</sub> XV                   | HEKEY <sub>N</sub> NAK  | 0.543<br>0.515          |
| S339 | PKA<br>PKC           | K/RK/RXS/T<br>R/KR/KR/K/F <sub>S</sub> FRR                       | LFRDSKTQK               | 0.760<br>0.664          |
| S364 | CKII                 | D/ED/ED/ES/TD/ED/E                                               | LILE <sub>S</sub> TRED  | 0.547                   |
| T365 | CDK1                 | LPXSPXKK                                                         | ILEST <sub>E</sub> REDL | 0.506                   |
| S401 | PKC                  | R/KR/KR/K/F <sub>S</sub> FRR                                     | VAWL <sub>S</sub> LLFN  | 0.567                   |
| T422 | CDK5                 | S/TPXK/H/R                                                       | MVIN <sub>T</sub> PKKR  | 0.582                   |
| T440 | PKC                  | R/KR/KR/K/F <sub>S</sub> FRR                                     | SGKT <sub>T</sub> VAAA  | 0.711                   |
| T485 | PKC                  | R/KR/KR/K/F <sub>S</sub> FRR                                     | VKGQ <sub>T</sub> EGKT  | 0.588                   |
| S502 | PKC                  | R/KR/KR/K/F <sub>S</sub> FRR                                     | NNLD <sub>S</sub> LRDH  | 0.612                   |
| S524 | PKG                  | R/KR/KXS/T                                                       | LNKR <sub>S</sub> QIFP  | 0.545                   |
| T533 | CKII                 | D/ED/ED/ES/TD/ED/E                                               | PGIIT <sub>M</sub> NEY  | 0.540                   |
| Y537 | INSR                 | YXXM                                                             | TMNEY <sub>N</sub> VPL  | 0.506                   |
| T542 | PKC                  | R/KR/KR/K/F <sub>S</sub> FRR                                     | NVPL <sub>T</sub> ILAR  | 0.516                   |
| S577 | PKC<br>PKA           | R/KR/KR/K/F <sub>S</sub> FRR<br>K/RK/RXS/T                       | RIVQ <sub>S</sub> GKTL  | 0.693<br>0.505          |
| S597 | CKII                 | D/ED/ED/ES/TD/ED/E                                               | VFHSS <sub>I</sub> HED  | 0.552                   |
| T608 | PKC<br>PKG           | R/KR/KR/K/F <sub>S</sub> FRR<br>R/KR/KXS/T                       | IWKE <sub>T</sub> LTKY  | 0.711<br>0.540          |
| T610 | PKC                  | R/KR/KR/K/F <sub>S</sub> FRR                                     | KETL <sub>T</sub> KYVS  | 0.655                   |
| T641 | CKII                 | D/ED/ED/ES/TD/ED/E                                               | ICED <sub>T</sub> ENNE  | 0.530                   |
| T646 | DNAPK                | QXS/TQE/D                                                        | ENNE <sub>T</sub> QDSA  | 0.623                   |

|      |      |                    |           |       |
|------|------|--------------------|-----------|-------|
|      | CKII | D/ED/ED/ES/TD/ED/E |           | 0.523 |
| T653 | CKII | D/ED/ED/ES/TD/ED/E | SAFCTQDSD | 0.558 |
| S656 | CKII | D/ED/ED/ES/TD/ED/E | CTQDSDNE  | 0.655 |

# NJPyV

| residue | Protein kinase      | Consensus motif              | Sequence in LTA <sub>g</sub> | score |
|---------|---------------------|------------------------------|------------------------------|-------|
| S8      | CKII                | D/ED/ED/ES/TD/ED/E           | VLEKSDKEM                    | 0.608 |
| Y34     | EGFR                | XXEXYYXX                     | MKTAYKRAS                    | 0.531 |
| S38     | PKC                 | R/KR/KR/K/F <sub>S</sub> FRR | YKRA <sub>S</sub> KIYH       | 0.880 |
|         | PKA                 | K/RK/RX <sub>S</sub> /T      |                              | 0.516 |
| S57     | PKC                 | R/KR/KR/K/F <sub>S</sub> FRR | MLLN <sub>S</sub> SLWQK      | 0.616 |
| S76     | CKII                | D/ED/ED/ES/TD/ED/E           | SEVF <sub>S</sub> DSYG       | 0.559 |
|         | CDK1                | LPX <sub>S</sub> PXKK        |                              | 0.520 |
| Y79     | INSR                | YXXM                         | FSD <sub>S</sub> YGSAN       | 0.580 |
|         | SRC                 | EEDVY <sub>G</sub> XV        |                              | 0.532 |
|         | EGFR                | XXEXYYXX                     |                              | 0.526 |
| Y88     | INSR                | YXXM                         | FRKRYASWC                    | 0.510 |
| S90     | PKB                 | RXR <sub>X</sub> *X*S/TF/L   | KRYA <sub>S</sub> WCSS       | 0.856 |
|         | RSK                 | RXRXX <sub>S</sub> /T        |                              | 0.579 |
|         | PKA                 | K/RK/RX <sub>S</sub> /T      |                              | 0.555 |
|         | PKC                 | R/KR/KR/K/F <sub>S</sub> FRR |                              | 0.510 |
| S94     | PKC                 | R/KR/KR/K/F <sub>S</sub> FRR | SWC <sub>S</sub> SVFTN       | 0.596 |
| S101    | CKII                | D/ED/ED/ES/TD/ED/E           | TNEK <sub>S</sub> DSRA       | 0.532 |
| S112    | GSK3                | S/TXXS/T                     | HCDE <sub>S</sub> PISS       | 0.519 |
| S115    | CKII                | D/ED/ED/ES/TD/ED/E           | ESPI <sub>S</sub> SSSD       | 0.565 |
| S116    | CKII                | D/ED/ED/ES/TD/ED/E           | SPI <sub>S</sub> SSSDE       | 0.665 |
| S117    | CKII                | D/ED/ED/ES/TD/ED/E           | PI <sub>S</sub> SSSDEE       | 0.737 |
| S118    | CKII                | D/ED/ED/ES/TD/ED/E           | ISS <sub>S</sub> SSDEED      | 0.722 |
|         | CKI                 | D/E(X)X <sub>S</sub> /T      |                              | 0.517 |
| T124    | CDK1                | LPX <sub>S</sub> PXKK        | EEDE <sub>T</sub> QSSG       | 0.554 |
| Y129    | EGFR                | XXEXYYXX                     | QSSGYN <sub>S</sub> SFP      | 0.562 |
| T135    | PKC                 | R/KR/KR/K/F <sub>S</sub> FRR | SFP <sub>T</sub> ISTPT       | 0.553 |
| T137    | CDK5                | S/TPXK/H/R                   | PFT <sub>S</sub> ITPTS       | 0.634 |
|         | p38 <sup>MAPK</sup> | PX <sub>S</sub> /TP          |                              | 0.568 |
| T139    | CDK5                | S/TPXK/H/R                   | TSTPT <sub>S</sub> PTS       | 0.609 |
|         | p38 <sup>MAPK</sup> | PX <sub>S</sub> /TP          |                              | 0.590 |
| T142    | PKC                 | R/KR/KR/K/F <sub>S</sub> FRR | PTP <sub>S</sub> ISTAS       | 0.751 |
| S146    | ATM                 | L/SSQE/D                     | TSTA <sub>S</sub> QEV        | 0.646 |
|         | DNAPK               | QXS/TQE/D                    |                              | 0.643 |
| S169    | PKC                 | R/KR/KR/K/F <sub>S</sub> FRR | SGSS <sub>S</sub> AGR        | 0.724 |
| T174    | CKII                | D/ED/ED/ES/TD/ED/E           | AGRNTETER                    | 0.603 |
| T176    | CKII                | D/ED/ED/ES/TD/ED/E           | RNTETERES                    | 0.587 |
|         | PKC                 | R/KR/KR/K/F <sub>S</sub> FRR |                              | 0.566 |
| S180    | CDK5                | S/TPXK/H/R                   | TERES <sub>S</sub> PPKR      | 0.684 |
|         | GSK3                | S/TXXS/T                     |                              | 0.512 |
| T188    | PKA                 | K/RK/RX <sub>S</sub> /T      | RRRG <sub>T</sub> EDLD       | 0.804 |
|         | RSK                 | RXRXX <sub>S</sub> /T        |                              | 0.558 |
| S194    | DNAPK               | QXS/TQE/D                    | DLDG <sub>S</sub> YTDS       | 0.566 |
|         | CKI                 | D/E(X)X <sub>S</sub> /T      |                              | 0.557 |

|      |                                     |                                                          |           |                         |
|------|-------------------------------------|----------------------------------------------------------|-----------|-------------------------|
|      | CDK1                                | LPXSPXKK                                                 |           | 0.522                   |
| T196 | CKII                                | D/ED/ED/ES/TD/ED/E                                       | DGSYTDSQT | 0.512                   |
| S198 | DNAPK<br>ATM                        | QXS/TQE/D<br>L/SSQE/D                                    | SYTDSQTSF | 0.614<br>0.546          |
| T200 | PKC                                 | R/KR/KR/K/F <sub>S</sub> FRR                             | TDSQTSFAS | 0.730                   |
| S201 | CKI                                 | D/E(X)XS/T                                               | DSQTSFAST | 0.506                   |
| S204 | PKC                                 | R/KR/KR/K/F <sub>S</sub> FRR                             | TSFASTPPK | 0.534                   |
| T205 | CDK1<br>PKC                         | LPXSPXKK<br>R/KR/KR/K/F <sub>S</sub> FRR                 | SFASTPPKQ | 0.737<br>0.631          |
| S213 | RSK<br>GSK3                         | RXRXXS/T<br>S/TXXXS/T                                    | QKRKSPDSP | 0.531<br>0.503          |
| S216 | CDK5<br>GSK3<br>p38 <sup>MAPK</sup> | S/TPXK/H/R<br>S/TXXXS/T<br>PXS/TP                        | KSPDSPSDL | 0.567<br>0.533<br>0.503 |
| S234 | PKC                                 | R/KR/KR/K/F <sub>S</sub> FRR                             | HAIFSNKTV | 0.793                   |
| T237 | PKC                                 | R/KR/KR/K/F <sub>S</sub> FRR                             | FSNKTVNAF | 0.563                   |
| T246 | PKC                                 | R/KR/KR/K/F <sub>S</sub> FRR                             | ILYSTLEKA | 0.657                   |
| S251 | PKA                                 | K/RK/RXS/T                                               | LEKASLLYE | 0.528                   |
| S266 | PKA                                 | K/RK/RXS/T                                               | IEFKSLHKL | 0.573                   |
| S292 | PKA<br>PKG                          | K/RK/RXS/T<br>R/KR/KXS/T                                 | KHRVSAMKN | 0.650<br>0.501          |
| S328 | DNAPK                               | QXS/TQE/D                                                | KPPFSQVKA | 0.530                   |
| S339 | CKII                                | D/ED/ED/ES/TD/ED/E                                       | DGLFSYDEE | 0.632                   |
| Y396 | EGFR                                | XXEXYYXX                                                 | KAHDYHKAH | 0.555                   |
| S412 | PKC                                 | R/KR/KR/K/F <sub>S</sub> FRR                             | EACKSQRSI | 0.651                   |
| S415 | PKA                                 | K/RK/RXS/T                                               | KSQRSICNQ | 0.513                   |
| T433 | CKII                                | D/ED/ED/ES/TD/ED/E                                       | RLLLTSTR  | 0.528                   |
| S435 | CKII                                | D/ED/ED/ES/TD/ED/E                                       | LLTESTREE | 0.551                   |
| T510 | PKC                                 | R/KR/KR/K/F <sub>S</sub> FRR                             | SGKTTFAAA | 0.704                   |
| S568 | CDK1                                | LPXSPXKK                                                 | GQGISNLDN | 0.550                   |
| T603 | PKG<br>CKII                         | R/KR/KXS/T<br>D/ED/ED/ES/TD/ED/E                         | PCVMTMNEY | 0.654<br>0.514          |
| Y607 | SRC                                 | EEDVYGVXV                                                | TMNEYFMPQ | 0.506                   |
| S618 | PKA<br>PKC<br>CKI                   | K/RK/RXS/T<br>R/KR/KR/K/F <sub>S</sub> FRR<br>D/E(X)XS/T | FVRFSLKLD | 0.759<br>0.592<br>0.511 |
| S625 | PKA                                 | K/RK/RXS/T                                               | LDFVSRPNL | 0.553                   |
| T636 | p38 <sup>MAPK</sup>                 | PXS/TP                                                   | AVDKTPGLV | 0.542                   |
| T650 | PKA                                 | K/RK/RXS/T                                               | QKGLTLFLL | 0.599                   |
| T659 | CDK1<br>CDK5                        | LPXSPXKK<br>S/TPXK/H/R                                   | LIWYTPVKK | 0.532<br>0.500          |
| S667 | PKA<br>CKII                         | K/RK/RXS/T<br>D/ED/ED/ES/TD/ED/E                         | KFAVSLQEE | 0.630<br>0.565          |
| T703 | CKII                                | D/ED/ED/ES/TD/ED/E                                       | ESPLTDLID | 0.604                   |

#### QPyV

| residue | Protein kinase     | Consensus motif                              | Sequence in LTag       | score                   |
|---------|--------------------|----------------------------------------------|------------------------|-------------------------|
| S6      | PKA<br>RSK<br>CKII | K/RK/RXS/T<br>RXRXXS/T<br>D/ED/ED/ES/TD/ED/E | DRLLSRDEV              | 0.587<br>0.580<br>0.578 |
| S20     | PKA<br>CDK1        | K/RK/RXS/T<br>LPXSPXKK                       | LIGLSMSNW              | 0.718<br>0.577          |
| S22     | CDK1               | LPXSPXKK                                     | GLSM <sub>S</sub> NWGN | 0.531                   |
| T65     | PKC                | R/KR/KR/K/F <sub>S</sub> FRR                 | KFAATMRDQ              | 0.835                   |

|      |                                     |                                       |             |       |
|------|-------------------------------------|---------------------------------------|-------------|-------|
| S70  | PKA                                 | K/RK/RXS/T                            | MRDQSSGNP   | 0.764 |
| S79  | CKII                                | D/ED/ED/ES/TD/ED/E                    | IWHFSSEEV   | 0.533 |
| T91  | CDK5<br>p38 <sup>MAPK</sup><br>GSK3 | S/TPXK/H/R                            | PPYGTPEWD   | 0.583 |
|      |                                     | PXS/TP                                |             | 0.548 |
|      |                                     | S/TXXS/T                              |             | 0.500 |
| Y110 | SRC                                 | EEDVYGXV                              | DEDLYCTEE   | 0.539 |
| S116 | CKII                                | D/ED/ED/ES/TD/ED/E                    | TEELSASDE   | 0.622 |
| S118 | CKII<br>CDK1                        | D/ED/ED/ES/TD/ED/E<br>LPXSPXKK        | ELSADEEQ    | 0.683 |
|      |                                     |                                       |             | 0.524 |
| T123 | CKII                                | D/ED/ED/ES/TD/ED/E                    | DEEQTAEDP   | 0.635 |
| S132 | ATM<br>DNAPK<br>CDK1                | L/SSQE/D                              | EEGCSQNSK   | 0.565 |
|      |                                     | QXS/TQE/D                             |             | 0.536 |
|      |                                     | LPXSPXKK                              |             | 0.519 |
| Y137 | EGFR                                | XXEXYYXX                              | QNSKYSATP   | 0.514 |
| S138 | PKG                                 | R/KR/KXS/T                            | NSKYSATPP   | 0.520 |
| T140 | CDK5<br>p38 <sup>MAPK</sup>         | S/TPXK/H/R<br>PXS/TP                  | KYSATPPKQ   | 0.593 |
|      |                                     |                                       |             | 0.543 |
| T179 | PKC<br>CKII                         | R/KR/KR/K/FSFRR<br>D/ED/ED/ES/TD/ED/E | FVCYTMEK    | 0.532 |
|      |                                     |                                       |             | 0.502 |
| S184 | PKA                                 | K/RK/RXS/T                            | TMEKSLMLY   | 0.546 |
| S209 | PKA                                 | K/RK/RXS/T                            | CNDGSGSIV   | 0.592 |
| S219 | PKC<br>CDK1                         | R/KR/KR/K/FSFRR<br>LPXSPXKK           | MITGSRHRP   | 0.795 |
|      |                                     |                                       |             | 0.581 |
| S224 | PKA<br>PKG                          | K/RK/RXS/T<br>R/KR/KXS/T              | RHRPSAILN   | 0.719 |
|      |                                     |                                       |             | 0.532 |
| S230 | PKC<br>CDK1                         | R/KR/KR/K/FSFRR<br>LPXSPXKK           | ILNASKKYC   | 0.870 |
|      |                                     |                                       |             | 0.534 |
| T235 | PKC                                 | R/KR/KR/K/FSFRR                       | KKYCTVSFS   | 0.631 |
| S237 | PKC                                 | R/KR/KR/K/FSFRR                       | YCTVSFSLV   | 0.598 |
| T260 | PKC                                 | R/KR/KR/K/FSFRR                       | GPNFTVIRE   | 0.591 |
| S265 | PKA                                 | K/RK/RXS/T                            | VIRE\$REGG  | 0.572 |
| S272 | CDK1<br>CKII                        | LPXSPXKK<br>D/ED/ED/ES/TD/ED/E        | GGLH\$YDFQ  | 0.575 |
|      |                                     |                                       |             | 0.549 |
| S279 | PKC                                 | R/KR/KR/K/FSFRR                       | FQEASKKFF   | 0.518 |
| S343 | PKG                                 | R/KR/KXS/T                            | KLFK\$AKVNQ | 0.520 |
| T352 | DNAPK                               | QXS/TQE/D                             | RGIA\$QAAD  | 0.635 |
| S360 | PKC<br>RSK                          | R/KR/KR/K/FSFRR<br>RXRXXS/T           | DRVLSARRV   | 0.673 |
|      |                                     |                                       |             | 0.573 |
| S369 | PKC                                 | R/KR/KR/K/FSFRR                       | MMIESTRVD   | 0.579 |
| T414 | PKC                                 | R/KR/KR/K/FSFRR                       | MPSFTTKLK   | 0.748 |
| T415 | PKC                                 | R/KR/KR/K/FSFRR                       | PSFTTKLKE   | 0.676 |
| T445 | PKC                                 | R/KR/KR/K/FSFRR                       | NSGKTTVAA   | 0.555 |
| T446 | PKC                                 | R/KR/KR/K/FSFRR                       | SGKTIVAAG   | 0.529 |
| S466 | PKC                                 | R/KR/KR/K/FSFRR                       | VNCSSDKIN   | 0.611 |
| T526 | PKC<br>PKG                          | R/KR/KR/K/FSFRR<br>R/KR/KXS/T         | ERKHTNKVS   | 0.751 |
|      |                                     |                                       |             | 0.530 |
| S530 | CDK1                                | LPXSPXKK                              | TNKV\$QLFP  | 0.512 |
| T539 | PKG                                 | R/KR/KXS/T                            | PCIITCNDY   | 0.516 |
| Y543 | INSR                                | YXXM                                  | TCNDYAI\$PR | 0.545 |
| T548 | PKC                                 | R/KR/KR/K/FSFRR                       | AIPRTVKAR   | 0.851 |
| S598 | CKII                                | D/ED/ED/ES/TD/ED/E                    | WEPV\$EFVE  | 0.628 |
| Y621 | SRC                                 | EEDVYGXV                              | RWVTYGM\$YQ | 0.507 |
| Y639 | SRC                                 | EEDVYGXV                              | KDPFYGVIM   | 0.553 |
| S644 | CKII<br>PKA                         | D/ED/ED/ES/TD/ED/E<br>K/RK/RXS/T      | GVIM\$DINE  | 0.577 |
|      |                                     |                                       |             | 0.534 |

|      |              |                       |           |                |
|------|--------------|-----------------------|-----------|----------------|
| T653 | DNAPK<br>ATM | QXS/TQE/D<br>L/SSQE/D | IVEETQEST | 0.603<br>0.505 |
| S656 | CKI          | D/E(X)XS/T            | ETQESTESG | 0.517          |
| T657 | CKI          | D/E(X)XS/T            | TQESTESGV | 0.575          |
| S659 | CKI          | D/E(X)XS/T            | ESTESGVGS | 0.597          |
| S663 | CKI          | D/E(X)XS/T            | SGVGSMET  | 0.536          |
|      | DNAPK        | QXS/TQE/D             |           | 0.525          |
|      | CKII         | D/ED/ED/ES/TD/ED/E    |           | 0.525          |

#### References

1. Blom, N.; Sicheritz-Pontén, T.; Gupta, R.; Gammeltoft, S.; Brunak S. Proteomics Prediction of post-translational glycosylation and phosphorylation of proteins from the amino acid sequence. *Proteomic* **2004**, *4*, 1633-1649.
2. Blom, N.; Gammeltoft, S.; Brunak S. Sequence and structure-based prediction of eukaryotic protein phosphorylation sites. *J. Mol. Biol.* **1999**, *294*, 1351-1362.
3. Rust, H.L.; Thompson, P.R. Kinase consensus sequences: a breeding ground for crosstalk. *ACS Chem. Biol.* **2011**, *6*, 881-892.
4. Safaei, J.; Mañuch, J.; Gupta, A.; Stacho, L.; Pelech, S. Prediction of 492 human protein kinase substrate specificities. *Proteome Sci.* **2011**, *9 Suppl 1*, S6.
5. Copps, K.D., White, M.F. Regulation of insulin sensitivity by serine/threonine phosphorylation of insulin receptor substrate proteins IRS1 and IRS2. *Diabetologia* **2012**, *55*, 2565-2582.
6. Hornbeck, P.V.; Zhang, B.; Murray, B.; Kornhauser, J.M.; Latham, V.; Skrzypek E. PhosphoSitePlus 2014: mutations, PTMs and recalibrations. *Nucleic Acids Res.* **2015**, *43*, D512-520.
7. Begley, M.J.; Yun, C.H.; Gewinner, C.A.; Asara, J.M.; Johnson, J.L.; Coyle, A.J.; Eck, M.J.; Apostolou, I.; Cantley, L.C. EGF-receptor specificity for phosphotyrosine-primed substrates provides signal integration with Src. *Nat. Struct. Mol. Biol.* **2015**, *22*, 983-990.

Supplementary Table S2. Putative phosphorylation sites in SV40 sTA<sub>g</sub> and human polyomaviruses and their protein kinase. The algorithm NetPhos3.1 was used to predict protein kinases [1,2]. The protein kinase consensus motifs are based on [3-7].

#### SV40

| residue | Protein kinase | Consensus motif        | Sequence in sTA <sub>g</sub> | score          |
|---------|----------------|------------------------|------------------------------|----------------|
| S10     | PKA            | K/RK/RXS/T             | REES                         | 0.749          |
| S22     | CKI<br>CDK1    | D/E(X)XS/T<br>LPXSPXKK | ERS<br>GLERSAWGN             | 0.510<br>0.503 |
| T57     | PKC            | R/KR/KR/K/FSFRR        | KKMNT                        | 0.842          |
| T81     | CDK1           | LPXSPXKK               | FWDAT <sub>EV</sub> FA       | 0.511          |
| S87     | CKI            | PS/GS/TPXR/K           | VFASSLNPG                    | 0.509          |
| Y96     | EGFR           | XXEXYYXX               | VDAM <sub>Y</sub> CKQW       | 0.532          |
| S108    | PKA            | K/RK/RXS/T             | KKMS                         | 0.653          |
| T167    | PKC            | R/KR/KR/K/FSFRR        | IIGQT <sub>TY</sub> R        | 0.755          |
| T168    | PKC            | R/KR/KR/K/FSFRR        | IIGQT <sub>TY</sub> R        | 0.654          |

#### BKPyV

| residue | Protein kinase      | Consensus motif                | Sequence in sTA <sub>g</sub>                     | score          |
|---------|---------------------|--------------------------------|--------------------------------------------------|----------------|
| T57     | PKC                 | R/KR/KR/K/FSFRR                | KRMNTLYKK                                        | 0.798          |
| S78     | CKII                | D/ED/ED/ES/TD/ED/E             | FGTWSSSEV                                        | 0.584          |
| S79     | CDK1                | LPXSPXKK                       | FGTWSSSEV                                        | 0.506          |
| S80     | CDKI<br>CKII        | LPXSPXKK<br>D/ED/ED/ES/TD/ED/E | FGTWSSSEV<br>FGTWSSSEV                           | 0.525<br>0.518 |
| S102    | PKC                 | R/KR/KR/K/FSFRR                | WPIC <sub>S</sub> KKPS                           | 0.727          |
| S106    | PKC<br>PKA          | R/KR/KR/K/FSFRR<br>K/RK/RXS/T  | SKKPS <sub>VH</sub> CP<br>SKKPS <sub>VH</sub> CP | 0.603<br>0.534 |
| T165    | p38 <sup>MAPK</sup> | PXS/TP                         | IGET <sub>TP</sub> FRD                           | 0.556          |

#### JCPyV

| residue | Protein kinase | Consensus motif        | Sequence in sTA <sub>g</sub> | score          |
|---------|----------------|------------------------|------------------------------|----------------|
| S79     | CDK1           | LPXSPXKK               | GTWNSSEVG                    | 0.506          |
| T103    | PKC            | R/KR/KR/K/FSFRR        | PNCATNP <sub>SV</sub>        | 0.512          |
| S128    | PKA            | K/RK/RXS/T             | KFLRSSPLV                    | 0.545          |
| S129    | PKA<br>CDK1    | K/RK/RXS/T<br>LPXSPXKK | KFLRSSPLV<br>KFLRSSPLV       | 0.596<br>0.503 |
| T151    | DNAPK<br>ATM   | QXS/TQE/D<br>L/SSQE/D  | GCDLTQEAL                    | 0.617<br>0.564 |

#### KIPyV

| residue | Protein kinase | Consensus motif                   | Sequence in sTA <sub>g</sub> | score          |
|---------|----------------|-----------------------------------|------------------------------|----------------|
| S6      | CKII           | D/ED/ED/ES/TD/ED/E                | DKT <sub>LS</sub> REEA       | 0.518          |
| S65     | CDK1           | LPXSPXKK                          | KLQDS <sub>V</sub> VSV       | 0.514          |
| S83     | DNAPK<br>CDK1  | QXS/TQE/D<br>LPXSPXKK             | IWQSSQVYC                    | 0.591<br>0.520 |
| Y102    | EGFR           | XXEXYYXX                          | VNAI <sub>Y</sub> GEYY       | 0.643          |
| Y105    | EGFR<br>SRC    | XXEXYYXX<br>EEDV <sub>Y</sub> GXV | IYGE <sub>Y</sub> YEAY       | 0.527<br>0.508 |
| Y106    | SRC<br>INSR    | EEDV <sub>Y</sub> GXV<br>YXXM     | YGE <sub>Y</sub> YEAYI       | 0.529<br>0.523 |
| Y109    | EGFR           | XXEXYYXX                          | YYEAYIMKQ                    | 0.543          |

|      |     |                          |                    |       |
|------|-----|--------------------------|--------------------|-------|
| S133 | PKC | R/KR/KR/K/F <u>S</u> FRR | HCIL <u>S</u> KYHK | 0.755 |
| T170 | PKC | R/KR/KR/K/F <u>S</u> FRR | ISMQ <u>T</u> FFFW | 0.722 |

#### WUPyV

| residue | Protein kinase | Consensus motif                | Sequence in sTag   | score |
|---------|----------------|--------------------------------|--------------------|-------|
| T4      | CDK1           | LPX <u>S</u> PXKK              | MDK <u>T</u> LSRN  | 0.505 |
| T32     | PKC            | R/KR/KR/K/F <u>S</u> FRR       | PLMR <u>T</u> KYLS | 0.512 |
| S36     | PKC            | R/KR/KR/K/F <u>S</u> FRR       | TKYL <u>S</u> KCKE | 0.638 |
| S57     | PKA            | K/RK/RX <u>S</u> / <u>T</u>    | KKLN <u>S</u> LYLK | 0.681 |
|         | PKC            | R/KR/KR/K/F <u>S</u> FRR       |                    | 0.620 |
| S81     | CKII           | D/ED/ED/ES/ <u>T</u> D/ED/E    | DEVW <u>S</u> SSQV | 0.566 |
| S82     | CKII           | D/ED/ED/ES/ <u>T</u> D/ED/E    | DEVW <u>S</u> SSQV | 0.544 |
| S83     | CKII           | D/ED/ED/ES/ <u>T</u> D/ED/E    | DEVW <u>S</u> SSQV | 0.618 |
|         | DNAPK          | QX <u>S</u> / <u>T</u> QE/D    |                    | 0.603 |
|         | CDK1           | LPX <u>S</u> PXKK              |                    | 0.531 |
|         | CKI            | PS/G <u>S</u> / <u>T</u> PXR/K |                    | 0.530 |
| Y106    | EGFR           | XXEXY <u>Y</u> YXX             | VGEV <u>Y</u> GDVF | 0.507 |
|         | SRC            | EEDV <u>Y</u> GXV              |                    | 0.507 |
| T174    | PKC            | R/KR/KR/K/F <u>S</u> FRR       | ISAE <u>T</u> FFYW | 0.767 |
|         | CKI            | PS/G <u>S</u> / <u>T</u> PXR/K |                    | 0.550 |
| T185    | PKC            | R/KR/KR/K/F <u>S</u> FRR       | IIFL <u>T</u> TMQG | 0.545 |

#### MCPyV

| residue | Protein kinase | Consensus motif                | Sequence in sTag   | score |
|---------|----------------|--------------------------------|--------------------|-------|
| Y24     | INSR           | <u>Y</u> XXM                   | APNC <u>Y</u> GNIP | 0.568 |
| S35     | PKC            | R/KR/KR/K/F <u>S</u> FRR       | AFKR <u>S</u> CLKH | 0.567 |
|         | PKG            | R/KR/KX <u>S</u> / <u>T</u>    |                    | 0.521 |
| T57     | PKC            | R/KR/KR/K/F <u>S</u> FRR       | MELN <u>T</u> LWSK | 0.571 |
| S60     | PKC            | R/KR/KR/K/F <u>S</u> FRR       | NTLW <u>S</u> KFQQ | 0.654 |
| S80     | PKC            | R/KR/KR/K/F <u>S</u> FRR       | FDEV <u>S</u> TKFP | 0.608 |
|         | CKI            | PS/G <u>S</u> / <u>T</u> PXR/K |                    | 0.538 |
| T81     | CKII           | D/ED/ED/ES/ <u>T</u> D/ED/E    | DEV <u>S</u> TKFPW | 0.563 |
| T90     | PKC            | R/KR/KR/K/F <u>S</u> FRR       | EEG <u>T</u> LKDY  | 0.677 |
| S117    | PKA            | K/RK/RX <u>S</u> / <u>T</u>    | QLRD <u>S</u> KCAC | 0.592 |
| S123    | PKC            | R/KR/KR/K/F <u>S</u> FRR       | CACI <u>S</u> CKLS | 0.635 |
| S132    | PKC            | R/KR/KR/K/F <u>S</u> FRR       | RQH <u>C</u> SLKTL | 0.657 |
| T135    | PKC            | R/KR/KR/K/F <u>S</u> FRR       | CSL <u>K</u> TLKQK | 0.922 |
| T143    | PKG            | R/KR/KX <u>S</u> / <u>T</u>    | KNCL <u>T</u> WGEC | 0.501 |
| T172    | CKII           | D/ED/ED/ES/ <u>T</u> D/ED/E    | WWQK <u>T</u> LEET | 0.589 |
| Y178    | EGFR           | XXEXY <u>Y</u> YXX             | EETD <u>Y</u> CLLH | 0.514 |

#### HPyV6

| residue | Protein kinase | Consensus motif             | Sequence in sTag   | score |
|---------|----------------|-----------------------------|--------------------|-------|
| S20     | PKA            | K/RK/RX <u>S</u> / <u>T</u> | LIGL <u>S</u> MACW | 0.631 |
|         | CDK1           | LPX <u>S</u> PXKK           |                    | 0.532 |
| T65     | PKC            | R/KR/KR/K/F <u>S</u> FRR    | KLNAT <u>L</u> RDQ | 0.572 |
| S73     | ATM            | L/ <u>S</u> <u>S</u> QE/D   | QM <u>S</u> SSPTWC | 0.520 |
| T75     | PKC            | R/KR/KR/K/F <u>S</u> FRR    | SS <u>S</u> PTWCFS | 0.661 |

|      |      |                          |                    |       |
|------|------|--------------------------|--------------------|-------|
| S80  | CKII | D/ED/ED/ES/TD/ED/E       | WCFSS <u>EV</u> SD | 0.505 |
| S83  | CKII | D/ED/ED/ES/TD/ED/E       | SSEVS <u>DD</u> WG | 0.597 |
| T91  | PKC  | R/KR/KR/K/F <u>S</u> FRR | GIPL <u>T</u> VGEF | 0.727 |
| S117 | CDK1 | LPXSPXKK                 | QQGIS <u>S</u> CKC | 0.518 |
| S118 | PKC  | R/KR/KR/K/F <u>S</u> FRR | GGIS <u>S</u> CKCL | 0.671 |
| S176 | CDK5 | <u>S</u> /TPXK/H/R       | IYQ <u>S</u> PLDW  | 0.509 |

#### HPyV7

| residue | Protein kinase             | Consensus motif                                 | Sequence in sTag   | score          |
|---------|----------------------------|-------------------------------------------------|--------------------|----------------|
| S38     | PKC<br>PKA                 | R/KR/KR/K/F <u>S</u> FRR<br>K/RK/RX <u>S</u> /T | VRLAS <u>K</u> KYH | 0.921<br>0.508 |
| S73     | RSK<br>p38 <sup>MAPK</sup> | RXRX <u>S</u> /T<br>PX <u>S</u> /TP             | QRSG <u>S</u> PMWH | 0.537<br>0.500 |
| S79     | CKII                       | D/ED/ED/ES/TD/ED/E                              | MWHY <u>S</u> SDEV | 0.585          |
| S80     | CKII                       | D/ED/ED/ES/TD/ED/E                              | WHY <u>S</u> SDEV  | 0.534          |
| S84     | CKII                       | D/ED/ED/ES/TD/ED/E                              | SDEV <u>S</u> FWDI | 0.530          |
| T91     | CKII                       | D/ED/ED/ES/TD/ED/E                              | DIEL <u>T</u> VGEF | 0.527          |
| S168    | CKI                        | PS/G <u>S</u> /TPXR/K                           | RSEE <u>S</u> FMWW | 0.536          |
| S173    | PKA                        | K/RK/RX <u>S</u> /T                             | FMWW <u>S</u> HIIF | 0.515          |
| T179    | p38 <sup>MAPK</sup>        | PX <u>S</u> /TP                                 | IIFQ <u>T</u> PMDV | 0.517          |

#### TSPyV

| residue | Protein kinase | Consensus motif                                 | Sequence in sTag   | score          |
|---------|----------------|-------------------------------------------------|--------------------|----------------|
| S6      | CKII<br>CKI    | D/ED/ED/ES/TD/ED/E<br>PS/G <u>S</u> /TPXR/K     | DKFL <u>S</u> REES | 0.598<br>0.517 |
| S10     | PKA<br>DNAPK   | K/RK/RX <u>S</u> /T<br>QX <u>S</u> /TQE/D       | SREE <u>S</u> LELM | 0.660<br>0.503 |
| S38     | PKC<br>PKA     | R/KR/KR/K/F <u>S</u> FRR<br>K/RK/RX <u>S</u> /T | HKKM <u>S</u> LKYH | 0.921<br>0.565 |
| S53     | PKA            | K/RK/RX <u>S</u> /T                             | PEKM <u>S</u> RLNQ | 0.611          |
| Y67     | EGFR<br>SRC    | XXEXY <u>Y</u> YXX<br>EEDV <u>Y</u> GXV         | QEGI <u>Y</u> NARQ | 0.629<br>0.513 |
| S76     | CDK1           | LPXSPXKK                                        | EFPT <u>S</u> FSSQ | 0.560          |
| S78     | CDK1           | LPXSPXKK                                        | PTSF <u>S</u> SQVG | 0.515          |
| S79     | ATM<br>DNAPK   | L/SSQE/D<br>QX <u>S</u> /TQE/D                  | TSF <u>S</u> SQVGS | 0.673<br>0.572 |
| S83     | CKII<br>CDK1   | D/ED/ED/ES/TD/ED/E<br>LPXSPXKK                  | SQVG <u>S</u> WYWE | 0.511<br>0.508 |
| Y85     | EGFR           | XXEXY <u>Y</u> YXX                              | VGSW <u>Y</u> WEAN | 0.501          |
| S92     | CKI<br>PKG     | PS/G <u>S</u> /TPXR/K<br>R/KR/KX <u>S</u> /T    | ANLI <u>S</u> LKEY | 0.546<br>0.528 |
| T125    | PKC            | R/KR/KR/K/F <u>S</u> FRR                        | CKCL <u>T</u> CKIG | 0.589          |
| S173    | CDK1           | LPXSPXKK                                        | LWAW <u>S</u> CIVG | 0.563          |

#### HPyV9

| residue | Protein kinase | Consensus motif                          | Sequence in sTag   | score          |
|---------|----------------|------------------------------------------|--------------------|----------------|
| S6      | CKII<br>DNAPK  | D/ED/ED/ES/TD/ED/E<br>QX <u>S</u> /TQE/D | DQTL <u>S</u> LEER | 0.622<br>0.505 |
| S28     | PKC            | R/KR/KR/K/F <u>S</u> FRR                 | WGNL <u>S</u> LMKK | 0.521          |
| Y34     | EGFR           | XXEXY <u>Y</u> YXX                       | MKK <u>A</u> YKTVS | 0.515          |
| T36     | PKC            | R/KR/KR/K/F <u>S</u> FRR                 | KAYK <u>T</u> VSKI | 0.831          |



|      |              |                                                 |                                            |                |
|------|--------------|-------------------------------------------------|--------------------------------------------|----------------|
| S38  | PKC          | R/KR/KR/K/F <u>S</u> FRR                        | YKTV <u>S</u> KIYH                         | 0.873          |
| S76  | CDK1         | LPX <u>S</u> PXKK                               | NCG <u>S</u> <u>S</u> <u>S</u> <u>S</u> QV | 0.548          |
| S78  | DNAPK<br>ATM | QX <u>S</u> /TQE/D<br>L/ <u>S</u> <u>S</u> QE/D | G <u>S</u> <u>S</u> <u>S</u> <u>S</u> QVAW | 0.603<br>0.529 |
| T113 | PKC          | R/KR/KR/K/F <u>S</u> FRR                        | PDCIT <u>Y</u> NKP                         | 0.727          |
| Y114 | EGFR         | XXEXY <u>Y</u> YXX                              | DCIT <u>Y</u> NKPS                         | 0.502          |
| S118 | PKA          | K/RK/RX <u>S</u> /T                             | YNKP <u>S</u> CCCI                         | 0.603          |
| S132 | PKC          | R/KR/KR/K/F <u>S</u> FRR                        | QQHK <u>S</u> TKIN                         | 0.898          |
| T133 | PKC<br>PKG   | R/KR/KR/K/F <u>S</u> FRR<br>R/KR/KX <u>S</u> /T | QHK <u>S</u> TKINK                         | 0.861<br>0.547 |
| S179 | PKA          | K/RK/RX <u>S</u> /T                             | NMDL <u>S</u> LLRL                         | 0.579          |

#### HPyV10

| residue | Protein kinase     | Consensus motif                                                 | Sequence in sTag   | score                   |
|---------|--------------------|-----------------------------------------------------------------|--------------------|-------------------------|
| S6      | CKII<br>RSK<br>CKI | D/ED/ED/ES/TD/ED/E<br>RXRX <u>S</u> /T<br>PS/G <u>S</u> /TPXR/K | DRVLSRDEV          | 0.576<br>0.540<br>0.502 |
| T37     | PKC                | R/KR/KR/K/F <u>S</u> FRR                                        | KYRQT <u>C</u> LKL | 0.714                   |
| S60     | PKC                | R/KR/KR/K/F <u>S</u> FRR                                        | NELF <u>S</u> KMYT | 0.531                   |
| Y63     | INSR               | <u>Y</u> XXM                                                    | FSKM <u>Y</u> TTIE | 0.522                   |
| T64     | PKC                | R/KR/KR/K/F <u>S</u> FRR                                        | SKMYT <u>T</u> IEK | 0.639                   |
| Y76     | SRC                | EEDV <u>Y</u> GXV                                               | EGEV <u>Y</u> FPAK | 0.518                   |
| T90     | CKI                | PS/G <u>S</u> /TPXR/K                                           | DDVV <u>T</u> LGDV | 0.520                   |
| S98     | CKII               | D/ED/ED/ES/TD/ED/E                                              | VLGP <u>S</u> FEEK | 0.514                   |
| Y105    | EGFR<br>INSR       | XXEXY <u>Y</u> YXX<br><u>Y</u> XXM                              | EKII <u>Y</u> IWPL | 0.611<br>0.517          |
| Y163    | INSR               | <u>Y</u> XXM                                                    | QEF <u>G</u> YTSFF | 0.521                   |
| S195    | PKC<br>CKI         | R/KR/KR/K/F <u>S</u> FRR<br>PS/G <u>S</u> /TPXR/K               | VSYF <u>S</u> FILG | 0.638<br>0.512          |

#### STLPyV

| residue | Protein kinase           | Consensus motif                                                                               | Sequence in sTag   | score                            |
|---------|--------------------------|-----------------------------------------------------------------------------------------------|--------------------|----------------------------------|
| S6      | PKC<br>CKII              | R/KR/KR/K/F <u>S</u> FRR<br>D/ED/ED/ES/TD/ED/E                                                | DQALS <u>R</u> AEA | 0.659<br>0.622                   |
| S23     | PKA                      | K/RK/RX <u>S</u> /T                                                                           | LPED <u>S</u> WGNV | 0.517                            |
| S31     | PKC                      | R/KR/KR/K/F <u>S</u> FRR                                                                      | VPLI <u>S</u> YRYR | 0.832                            |
| S38     | PKB<br>PKC<br>RSK<br>PKG | RXR <u>X</u> *X*S/TF/L<br>R/KR/KR/K/F <u>S</u> FRR<br>RXRX <u>S</u> /T<br>R/KR/KX <u>S</u> /T | YRQK <u>S</u> KIYH | 0.806<br>0.745<br>0.580<br>0.575 |
| S71     | CKII<br>CDK1             | D/ED/ED/ES/TD/ED/E<br>LPX <u>S</u> PXKK                                                       | QNR <u>S</u> SEN   | 0.553<br>0.537                   |
| S72     | PKA<br>CDK1              | K/RK/RX <u>S</u> /T<br>LPX <u>S</u> PXKK                                                      | NLR <u>S</u> SENE  | 0.615<br>0.524                   |
| S73     | RSK                      | RXR <u>X</u> <u>S</u> /T                                                                      | LR <u>S</u> SENE   | 0.519                            |
| T90     | CDK1                     | LPX <u>S</u> PXKK                                                                             | LLSD <u>T</u> FTLG | 0.522                            |
| T92     | CKI                      | PS/G <u>S</u> /TPXR/K                                                                         | SDT <u>F</u> TLGDL | 0.592                            |
| S103    | CDK1                     | LPX <u>S</u> PXKK                                                                             | PQF <u>E</u> SKVIF | 0.536                            |
| T111    | PKC                      | R/KR/KR/K/F <u>S</u> FRR                                                                      | FIWPT <u>C</u> AKC | 0.502                            |
| T119    | PKG                      | R/KR/KX <u>S</u> /T                                                                           | CRYRT <u>F</u> CKC | 0.645                            |
| T145    | PKG                      | R/KR/KX <u>S</u> /T                                                                           | KPCV <u>T</u> WGEC | 0.538                            |
| S167    | PKC<br>PKA               | R/KR/KR/K/F <u>S</u> FRR<br>K/RK/RX <u>S</u> /T                                               | FTKT <u>S</u> LHAW | 0.722<br>0.525                   |

X\*=polar amino acid

#### NJPyV

| residue | Protein kinase      | Consensus motif        | Sequence in sTag        | score |
|---------|---------------------|------------------------|-------------------------|-------|
| S8      | CKII                | D/ED/ED/ES/TD/ED/E     | VLEKSDKEM               | 0.608 |
| Y34     | EGFR                | XXEXY <sup>*</sup> YXX | MKTAYKRAS               | 0.531 |
| S38     | PKC                 | R/KR/KR/K/FSFRR        | YKRASKIYH               | 0.880 |
|         | PKA                 | K/RK/RXS/T             |                         | 0.518 |
| S57     | PKC                 | R/KR/KR/K/FSFRR        | MLLN <sup>*</sup> SLWQK | 0.616 |
| S78     | CDK1                | LPXSPXKK               | VCQV <sup>*</sup> FSDC  | 0.551 |
| S80     | CDK1                | LPXSPXKK               | QVSFSDCYD               | 0.543 |
| S85     | CDK1                | LPXSPXKK               | DCYDSLLK                | 0.520 |
| S86     | PKC                 | R/KR/KR/K/FSFRR        | CYDSLLKC                | 0.506 |
| S92     | p38 <sup>MAPK</sup> | PXS/TP                 | LKCCSPKVF               | 0.509 |
|         | CDK1                | LPXSPXKK               |                         | 0.505 |
| S103    | p38 <sup>MAPK</sup> | PXS/TP                 | LFLR <sup>*</sup> PQCL  | 0.584 |
|         | CDK5                | S/TPXK/H/R             |                         | 0.526 |
| T138    | PKA                 | K/RK/RXS/T             | KRCLTWGNC               | 0.786 |
|         | PKG                 | R/KR/KXS/T             |                         | 0.538 |
|         | PKC                 | R/KR/KR/K/FSFRR        |                         | 0.524 |
| T157    | PKC                 | R/KR/KR/K/FSFRR        | GLRETWKTf               | 0.692 |

#### QPyV

| residue | Protein kinase | Consensus motif    | Sequence in sTag | score |
|---------|----------------|--------------------|------------------|-------|
| S6      | PKA            | K/RK/RXS/T         | DRLLSRDEV        | 0.587 |
|         | RSK            | RXRXS/T            |                  | 0.580 |
|         | CKII           | D/ED/ED/ES/TD/ED/E |                  | 0.578 |
| S20     | PKA            | K/RK/RXS/T         | LIGLSMSNW        | 0.718 |
|         | CDK1           | LPXSPXKK           |                  | 0.577 |
| S22     | CDK1           | LPXSPXKK           | GLSMSNWGN        | 0.531 |
| T65     | PKC            | R/KR/KR/K/FSFRR    | KFAATMRDQ        | 0.835 |
| S70     | PKA            | K/RK/RXS/T         | MRDQSSGNP        | 0.764 |
| S79     | CKII           | D/ED/ED/ES/TD/ED/E | IWHFSSEEV        | 0.547 |
| S80     | CKII           | D/ED/ED/ES/TD/ED/E | WHFSSEEVs        | 0.500 |
| T173    | DNAPK          | QXS/TQE/D          | FEWWTQITY        | 0.561 |
| T179    | DNAPK          | QXS/TQE/D          | IYGTQMDV         | 0.549 |
|         | ATM            | L/SSQE/D           |                  | 0.501 |

#### References

1. Blom, N.; Sicheritz-Pontén, T.; Gupta, R.; Gammeltoft, S.; Brunak S. Proteomics Prediction of post-translational glycosylation and phosphorylation of proteins from the amino acid sequence. *Proteomic* **2004**, *4*, 1633-1649.
2. Blom, N.; Gammeltoft, S.; Brunak S. Sequence and structure-based prediction of eukaryotic protein phosphorylation sites. *J. Mol. Biol.* **1999**, *294*, 1351-1362.
3. Rust, H.L.; Thompson, P.R. Kinase consensus sequences: a breeding ground for crosstalk. *ACS Chem. Biol.* **2011**, *6*, 881-892.
4. Safaei, J.; Mañuch, J.; Gupta, A.; Stacho, L.; Pelech, S. Prediction of 492 human protein kinase substrate specificities. *Proteome Sci.* **2011**, *9 Suppl 1*, S6.
5. Copps, K.D.; White, M.F. Regulation of insulin sensitivity by serine/threonine phosphorylation of insulin receptor substrate proteins IRS1 and IRS2. *Diabetologia* **2012**, *55*, 2565-2582.
6. Hornbeck, P.V.; Zhang, B.; Murray, B.; Kornhauser, J.M.; Latham, V.; Skrzypek E. PhosphoSitePlus 2014: mutations, PTMs and recalibrations. *Nucleic Acids Res.* **2015**, *43*, D512-520.

7. Begley, M.J.; Yun, C.H.; Gewinner, C.A.; Asara, J.M.; Johnson, J.L.; Coyle, A.J.; Eck, M.J.; Apostolou, I.; Cantley, L.C. EGF-receptor specificity for phosphotyrosine-primed substrates provides signal integration with Src. *Nat. Struct. Mol. Biol.* **2015**, *22*, 983-990.

Supplementary Figure S1. Alignment of LTag from SV40 and HPyVs. The known phosphorylation sites in SV40 are shown in grey and conserved residues are highlighted in green. Clustal was used for alignment [1].

## Alphaviruses

|    |                                                                 |     |
|----|-----------------------------------------------------------------|-----|
| SV | MDKVLNREESLQ LMDLLGLERSAWGNIPLMRKAYLKKCKEFHPDKGGDEEKMKKMNTLYK   | 60  |
| TS | MDKFLSREESLELMDLLQIPRH CYGNFALMKINHKKMSLKYHPDKGGDPEKMSRLNQLWQ   | 60  |
| H9 | MDQTLSLEERNE LMDLLQLTRA AWGNLSLMKKAYKTVSKIYHPDKGGNPEKMQR LNELFQ | 60  |
| MC | MDLV LNRKEREALCKLLEIAPNCYGNIPLMKAAFKRSC LKHHHPDKGGNPVIMMELNTLWS | 60  |
| NJ | MEKVLEKSDKEMLI ELLGIPRYAYGNFPI MKTAYKRASKIYHPDKGGSSEKMMLLNSLWQ  | 60  |
|    | *: * . .: * .** : .:***: *: . . .*****. * : * *..               |     |
|    |                                                                 |     |
| SV | KMEDGVKYAHQPDFGG-----FWDAT EIPT YGTDEWEQW---WNAFN               | 99  |
| TS | KLQEG IYNARQE-FPTSFSSQH--DVPT-----QDGRDIPPYGHPSWASW---WESFN     | 107 |
| H9 | KLQVTLL EIRSN-CGSSSSQGYSDSPYFTETPF SYCERKNEDPEGGSWGKW---WREFV   | 116 |
| MC | KFQQNIHKLRSD-FSMFDEV D---EA-----PIYGTTFKFEW---WRSGG             | 98  |
| NJ | KFQEG LIEVRDS-EVFSD-----SYGSANFRKRYASWCSSV                      | 95  |
|    | *:: : :. .: . *                                                 |     |
|    |                                                                 |     |
| SV | E-----                                                          | 100 |
| TS | QEW D-----                                                      | 111 |
| H9 | NK-----                                                         | 118 |
| MC | FSFGKAYEYGP NPHGTNSRSRKPSSNASRGAPSGSSPPHSQSSSSGYGSFSASQASDSQS   | 158 |
| NJ | FTNEKSD-----SRA---DLHCDESP ISSSSDEEDETQSSGYNSFPFTSTP----        | 138 |
|    |                                                                 |     |
| SV | -----ENLFCSEEM                                                  | 109 |
| TS | -----NLFDTMQDPDLFCHEST                                          | 128 |
| H9 | -----EYDDLFCSETI                                                | 129 |
| MC | RGPDI PPEHH EPTSSSGSSSREETTNSGRESSTPNGTSVPRNSSRTDGTWEDLFCDESL   | 218 |
| NJ | -----                                                           | 138 |
|    |                                                                 |     |
| SV | PSSDDEAT-----                                                   | 117 |
| TS | IP SDES R-----SP-----SPTPGPSTQFSEENSRR-----RRAAPP----           | 160 |
| H9 | SSSDDEN-----NP-----GPSAPPPSSAS-----A-----SEDPDP----             | 156 |
| MC | SSPEPPSSS EEP EPPSRSSPRQPPSSSAEEASSSQFTDEEYRSSSFTTPKTPPPFSRK    | 278 |
| NJ | ---TP-STSTASQEVPPPFSEPFQFP ESSSASGSSSAGRNT-----ETERESP PKRRR    | 186 |
|    |                                                                 |     |
| SV | -----ADSQHSTPPKKK--RKVEDPKDFPSELLSFLSHAVFSNRTLACFAI             | 161 |
| TS | -----EDSPGCTQSSFSATPPKPKKSKYDSVPNDFPDMLRPFLSNAVYSNKTLS SFLI     | 213 |
| H9 | -----EEEAGSSQSSFTCTPPKRKKPE-PNTPEDFPMCLYSFLSHAIYSNKT MNCF LI    | 208 |
| MC | RKFGGSRSSASSASSASFTSTPPKPKKNRETPVPTDFPIDLS DYLSHAVYSNKT VSCFAI  | 338 |
| NJ | G--TEDLDGSYTD SQTSFASTPPKQKR-KSPDSPSDLPSCLFDFVSHAIFSNKTVNAFIL   | 243 |
|    | * .**** * . * *: * * :*: *: *: *: *                             |     |
|    |                                                                 |     |
| SV | YTTKEKAALLYKKIMEK-----YSVT FISRHSYN-----HNILFFLTPHRHRVSAINNY    | 211 |
| TS | YTTNEKA EYLYKKLDKFN-----PEFKSRHSFQE-----GSMVFLMTPGKHRVSAIKNL    | 262 |
| H9 | YTTVEKSKQLYRTVEKSKIKVDFKAI FLYKDDGIE-----GGLLYFITLGKHRVSAVKHF   | 263 |
| MC | YTTSDKAI ELYDKIEKFV-----DFKSRHACEL-----GCILLFITLSKHRVSAIKNF     | 387 |
| NJ | YSTLEKASLLYEKIDKFKI-----EFKSLHLKLT EGANVGGLV LVTIAKHRV SAMKNF   | 297 |
|    | *:* *: * * .: : * . : : .*: :*****::                            |     |
|    |                                                                 |     |
| SV | AQKLCTFSFLICKGVNKEYLMYSALTRDPFSVIEESLP GGLKEHDFNP EEA EETKQVSWK | 271 |
| TS | CVTHCTV SFLLCKAVIKQVECYRCMCSEPFKLLEESKPGIF-EYEF--NEENGKPVVNW N  | 319 |
| H9 | CVAQCTFSFIHCKAVIKPLELYRALGKPPFKLLEENKPGVS-MFDF--QEEKE-QAVNWQ    | 319 |
| MC | CSTFCTISFLICKGVNKMPEM YNNLCKPPYKLLQENKP-LL-NYEF--QEKEKEASCNWN   | 443 |
| NJ | CQQFCTV SF LICKVVLKPLECYQCLCKPPFSQVKANKDGLF-SYDF--ED-KKEENCNWN  | 353 |
|    | . **.**: ** * * * : * :. :. . .: * : : : *                      |     |
|    |                                                                 |     |
| SV | LVTEYAMETKCD DVL LLLGMYLEFQYSFEMCLKCIKKEQPSHYKYHEKH YANAAIFADSK | 331 |
| TS | LLTDFAVTNRLDDPLLIMAHYLDFAE EPSICSKCTKKALKAHYNYHSLH HKNAKLFKECK  | 379 |
| H9 | EICNYAVEAKITDVL LLLGIYLDFAVEPGTCSKCEKSKHKFHYNYHSHKHANACLFLESK   | 379 |
| MC | LVAEFACEYELDDHFII LAHYLDFA-KPFP CQKCENSR LKPKHAHEAHSNAKLFYESK   | 502 |

|    |                                                                                                                                                                                           |     |
|----|-------------------------------------------------------------------------------------------------------------------------------------------------------------------------------------------|-----|
| NJ | KVAEFAVLADIDDPILLI LAHYLDFA-QPFPCLKEHQK-TKAHDYHKAHHENAVLFEACK<br>: : :*       * : : : . ** : *       : . * . * : ** : * . *                                                               | 411 |
| SV | NQKTICQQAVDQVLAQKRVDSLQLTREQMLTNRFNLDLDRMDIMFGSTGSADIEEWMAGV                                                                                                                              | 391 |
| TS | TQKTACQQAADVMAKQRLKLIESTRKELEERFKLMFEKLTDE---FGQIKILQYMAGV                                                                                                                                | 436 |
| H9 | SQKNICQQAVDQVLAQKRLKLVECTRMELLEDRFIQLFDEMEDFL--HGEIEILRWMSGV                                                                                                                              | 437 |
| MC | SQKTICQQAADTVLAKRRLEMLEMTRTEMLCKKFKKHLERLRDL----DTIDLLYYMGGV                                                                                                                              | 558 |
| NJ | SQRSICNQASDIVLAKRRLLLTESTREELLAMCFQKQLKALQAL----DTLEIYDHMAGV<br>. * . . * : ** * * : * : * :       : ** : : *       *       : . :       .       :       * . **                            | 467 |
| SV | AWLHCLLPKMDSVVYDFLKCMVYNIPKKRYWLFKGPIDSGKTTLAAALLELCGGKALNVN                                                                                                                              | 451 |
| TS | AWYSCLFENIDEVVTIKILKLVENVPKKRNCLFRGPINSKGTTFAAALMNFLGGKTLNVN                                                                                                                              | 496 |
| H9 | AWYTILLDNSWDVFQKILQLVTTSQPKKRNI LFKGPINSKGTTLASAFMHFFDGGKALNIN                                                                                                                            | 497 |
| MC | AWYCCLFEEFEKKLQKIIQLLTENIPKYRNIWFKGPINSKGTSFAAALIDLLEGKALNIN                                                                                                                              | 618 |
| NJ | AWYANLFENFDDILFQILKLLTQNI PKQRNIFRGPVNSKGTTFAAALVDLLGGRSLNVN<br>**       * : :       . . . : : : . . ** *       * : ** : : ** : : ** : : :       * : ** : *                               | 527 |
| SV | LPLDRLNFELGVAIDQFLVVFEDVKGTTGGESRDLPSSQGINNLDNLRDYL DGSVKVNLEK                                                                                                                            | 511 |
| TS | CPADKLPFELGCAIDQFVVFEDVKGQIALNKKLQPGQGVSNLDNLRDHL DGSVKVDLER                                                                                                                              | 556 |
| H9 | CPAEKLSFELGCAIDQFCVLLDDVKGQITLNKHLQPGQGVNNLDNLRDHL DGTIKVNLEK                                                                                                                             | 557 |
| MC | CPSDKLPFELGCALDKFMVVFEDVKGQNSLNKDLQPGQGINNLDNLRDHL DGAVAVSLEK                                                                                                                             | 678 |
| NJ | CPADKLNLFELGCAIDRFVVFEDVKGQNMNLNKKLQPGQGISNLDNMRDYL DGAVPVNLEK<br>*       : : *       ** *       * : * : *       * : : : ** *       . : . *       ** : . ** : : ** : : ** : : * . ** :    | 587 |
| SV | KHLNKRQIFPPGIVTMNEYSVPKTLQARFVKQIDFRPKDY LKHCLERSEFLLEKRIIQS                                                                                                                              | 571 |
| TS | KHVNKRSQIFPPCLVTMNEYLLPETIFTRFAYVLNFTPKHNLRSCLQVSDYLLTERILQD                                                                                                                              | 616 |
| H9 | KHVNKRSQIFPPVIMTMNEYLLPPTVGVRFALHIHFHCKTYLKQSLEKSD-LIEKRILNS                                                                                                                              | 616 |
| MC | KHVNKKHQIFPPCIVTANDYFIPKTLIARFSYTLHFSPKANLRDSLDQNM EIRKRRILQS                                                                                                                             | 738 |
| NJ | KHMNKR SQVFPPCVMTMNEYFMPQTLFVRFS LKLDVSRPNLQSAVDKTPGLVANRILQK<br>** : ** :       * : ** : : * * :       * *       : . *       :       * :       : : :       . :       :       . ** : : .  | 647 |
| SV | GIALLLMLIWYRPVAEFAQSIQSRIVEWKERLDKEFSLSVYQKMKFNVAMGIGVLDWLRN                                                                                                                              | 631 |
| TS | GVTIALLLVWYCPITMFSESIKEDVKYWKDILCKYMGHTNFATLLLNVEEGK DPLDSVVI                                                                                                                             | 676 |
| H9 | GYTILLLLWYNPVDSTFPKVQEYVVKWKEILERHVSITQFGNIQQNILDGKDPLHGIVI                                                                                                                               | 676 |
| MC | GTTLCLLIWCLPDTTFKPCLQEEIKNWKQILQSEISYGKFCQMIENVEAGQDPLL NILI                                                                                                                              | 798 |
| NJ | GLTLFLLLIWYTPVKKFAVSLQEEIANWKCIIEKTVSHSDFCKMLENIEVGESPLTDLID<br>*       : : *       * : *       *       : : . :       * *       :       . .       :       :       * :       * . *       : | 707 |
| SV | SDDDDDEDQENADKNEDGGEKNMEDSGHETGIDSQSQGSFQAPQSSQSVHDHNQPYHICR                                                                                                                              | 691 |
| TS | EVEDEEEEF-SET-----NDSGFQ----TQ-----                                                                                                                                                       | 697 |
| H9 | EEQA-----                                                                                                                                                                                 | 680 |
| MC | EEEGPEETE---ET-----QDSGTF---SQ-----                                                                                                                                                       | 817 |
| NJ | EGDN-----<br>. :                                                                                                                                                                          | 711 |
| SV | GFTCFKKPPTPPPEPET 708                                                                                                                                                                     |     |
| TS | ----- 697                                                                                                                                                                                 |     |
| H9 | ----- 680                                                                                                                                                                                 |     |
| MC | ----- 817                                                                                                                                                                                 |     |
| NJ | ----- 711                                                                                                                                                                                 |     |

## Betapolyomaviruses

|    |                                                                    |     |
|----|--------------------------------------------------------------------|-----|
| SV | MDKVLNREESLQ LMDLLGLERSAWGNIPLMRKAYLK KCKEFHPDKGGDEEKM KKMNTLYK    | 60  |
| BK | MDKVLNREESMELMDLLGLERAAGWNLPLMRKAYLRKCKEFHPDKGGDEDKMKRMNTLYK       | 60  |
| JC | MDKVLNREESMELMDLLGLDRSAWGNIPVMRKAYLK KCKELHPDKGGDEDKMKRMNFLYK      | 60  |
| KI | MDKTL SREEAKQLMQLLCLDMSCWGNLPLMRQYLVKCKEYHPDKGGNEESMKLLNSLYL       | 60  |
| WU | MDKTL SRNEAKELMQLLGLDMTCWGNLPLMRKYLSKCKEFHPDKGGNEEKMKLLNSLYL       | 60  |
|    | ***.*.*.*: : **:* * : .:***:*:* * * * * * * * * * * : .: * * : * * |     |
| SV | KMEDGVKYAHQPD--FGGFWDAT EIP TYGTDEWEQW WNAFNE--ENLFCSEEMPSSDDE     | 115 |
| BK | KMEQDVKVAHQPD--FG-TWSSSEVPTYGTEEWESWSSSFNEKWDEDLFCHEDMFASDEE       | 117 |
| JC | KMEQGVKVAHQPD--FG-TWNSSEVPTYGTEEWESW WNTFNEKWDEDLFCHEEMFASDDE      | 117 |
| KI | KLQDSVSSVHDLNEEEDNIWQSSQIPT YGTPDLDEWWSQFNTYWEEELRCNESMPSSPKR      | 120 |
| WU | KLQECVSTVHQLNEEEDVWSSSQIPT YGTPDWYDWWWSQFNSYWEEELRCNEEMPKSPGE      | 120 |
|    | *::: * . .*: : . * .:::***** : : * . * * * : * * * . * *           |     |
| SV | AT-----ADSQHSTPPKKKR--KVEDPKDFPSELLSFLSHAVFSNRTLACFAIYT            | 163 |
| BK | AT-----ADSQHSPPKKKR--KVEDPKDFPSDLHQFLSQAVFSNRTLACFAVYT             | 165 |
| JC | NT-----GSQHSPPKKKK--KVEDPKDFPVDLHAFLSQAVFSNRTVASFAVYT              | 164 |
| KI | S-----APEEPPSCSQAPPPKKK--HAFDASLEFPKELLE FVSHAVFSNKCITCFV VHT      | 172 |
| WU | TPTKRTREDDEEPQCSQAPPPKKKKDNATDASLSFPKELEEFVSQAVFSNRTLTA FVIHT      | 180 |
|    | .:::***** : . * * : * * : * * * * : : .: * .: *                    |     |
| SV | TKEKAALLYKKIMEKYSVTFISRHSYNHNILFFLT PHRHRVSAINNYAQKLCTFSFLIC       | 223 |
| BK | TKEKAQILYKKLMEKYSVTFISRHCAGHNIFFLT PHRHRVSAINNFCQKLCTFSFLIC        | 225 |
| JC | TKEKAQILYKKLMEKYSVTFISRHGFGGHNILFFLT PHRHRVSAINNYCQKLCTFSFLIC      | 224 |
| KI | TREKGEVLYKKLLQKYQCSFISKHAFYNTVLIFFLT PHKHRVSAINNFCKGHCTVSFLFC      | 232 |
| WU | TKEKAETLYKKLLSKFKCNFASRHSYNTALVFILT PFRHRVSAVNNFCKGYCTISFLFC       | 240 |
|    | *:* . * * * * : .: * . * * * * .: * * * * : : * * * * : *          |     |
| SV | KGVNKEYLMYSALTRDPFSVIEESLPGGLKEHDFNPEEAE---ETKQVSWKLVTEYAMET       | 280 |
| BK | KGVNKEYLLYSALTRDPYHTIEESIQGGLEKHDNFNPEEPE---ETKQVSWKLITEYAVET      | 282 |
| JC | KGVNKEYLFYSALCRQPYAVVEESIQGGLEKHDNFNPEEPE---ETKQVSWKLV TQYALET     | 281 |
| KI | KGVNPNPYGLYSRMC RKP FNLC EENIPGGLKENEFNPEDLFGE PKEPSLSWNQIANFALEF  | 292 |
| WU | KGVNNAYGLYSRMT RPF T LCEENIPGGLKENDFKAEDLYGEFKD-QLNWKALSEFALEL     | 299 |
|    | ****: * : * * : * .: * * * * * * : * : .: * : * * * * *            |     |
| SV | KCDDVLLLLGMYLEFQYSFEMCLKCIKKEQPSHYKYEKHYANAAIFADSKNQKTICQQA        | 340 |
| BK | KCEDVFLLLGMYLEFQYNVEECKKCKQKQDPYHFYHEKH FANATIFAESKNQKSICQQA       | 342 |
| JC | KCEDVFLLMGMYLDFQENPQQCKKCEKKDQPNHFNHHEKHYNAQIFADSKNQKSICQQA        | 341 |
| KI | DIDDVYLLGSYIRFATKPEECEKCSKNDDATHKRVHVQN HENAVLLQESKSLKNACTQA       | 352 |
| WU | GIDDVYLLGLYLQLSIKVEECEKCSNEDATHNRLHMEHQKNALLFSDSKSQKNVCQQA         | 359 |
|    | : * * * : * : : * * * .: : * . * : : * * : : * . * . * * *         |     |
| SV | VDTVLA KRVDLSQLTREQMLTNRFNLDLRMDIMFGSTGSADIEEWMAGVAWLHCLLPK        | 400 |
| BK | VDTVLA KRVDTLHMTREEMLT ERFNHLDKMDLIFGAHGN AVLEQY MAGVAWLHCLLPK     | 402 |
| JC | VDTVA AKQRVDSIHMTREEMLVERFNFLDKMDLIFGAHGN AVLEQY MAGVAWIHCLLPQ     | 401 |
| KI | IDRVIA ERRYNCVTLTRKKLLTKRFKKLFNEMDKIV--GERKILLYMASIAWYTGLNKK       | 410 |
| WU | IDVVI AKRRVDSL NMSREDLLARRFEKILDKMDKTIK--GEQDVLLY MAGVAWYLG LNGK   | 417 |
|    | : * * * : * : : * * : * * * * : : * * . * : : * * : : * * * * *    |     |
| SV | MDSVYDFL KCMVYNI PKKRYWLFKGPIDSGKTTLAAALLELCGGKALNVNLP LDRLNFE     | 460 |
| BK | MDSVIFDFLHCIVFNVPKRRYWLFKGPIDSGKTTLAAGLLDL CGGKALNVNLP MERLTFE     | 462 |
| JC | MDTVIYDFL KCIVLNIPKKRYWLFKGPIDSGKTTLAAALLDL CGGKSLNVNMP LERLNFE    | 461 |
| KI | IDELVVRFLKLIVDNKPKHRYWLFKGPINS GKTTLATALLNL CGGKALNINIPSEKLPFE     | 470 |
| WU | IDELVYRLK VIVENVPKKRYWVFGPINS GKTTVAAALLDL CGGKALNINIPADRLNFE      | 477 |
|    | : * : : * : : * * * * * * * * * * : * * * * * * * * * * : * * *    |     |
| SV | LGVAIDQFLVVFEDVKGTGGESRDLPSGQGINNLDNLRDYLDG SVKVNLEKKHLNKR TQI     | 520 |
| BK | LGVAIDQYMVVFEDVKGTGAESKDLPSGHGINNLD SLRDYLDG SVKVNLEKKHLNKR TQI    | 522 |
| JC | LGVGIDQFMVVFEDVKGTGAESRDLPSGHGISNLDC LRDYLDG SVKVNLERKHQNKRTQV     | 521 |
| KI | LGVALDQYMVVFEDVKQIGIEKQLPSGNGVNNLDNLRDYLDGCVEVNLEKKHVNKR SQI       | 530 |
| WU | LGVAIDQFTVVFEDVKGVQVDNKLLPSGNGMSNLDNLRDYLDG SVKVNLEKKHLNKR SQI     | 537 |
|    | ***.:*:* : * * * * * . : * * * : * * * * * * * * * * * * * * * *   |     |
| SV | FPPGIVTMNEYSVPKTLQARFVKQIDFRPKDYLKHCLERSEF LLEKRIIQSGIALLLMLI      | 580 |

|    |                                                               |     |
|----|---------------------------------------------------------------|-----|
| BK | FPPGLVTMNEYVPVKTLQARFVRQIDFRPKIYLRKSLQNSEFLLEKRILQSGMTLLLLLI  | 582 |
| JC | FPPGIVTMNEYSVPRTLQARFVRQIDFRPKAYLRKSLSCSEYLLLEKRILQSGMTLLLLLI | 581 |
| KI | FPPGIVTMNEYCIPETVAVRFEKTMFTIKRNLRESLEKTPQLLSQRILHSGIAMLLLLLI  | 590 |
| WU | FPPGIVTMNEYLVPATLAPRFHKTVLFTPKRHLKESLDKTPELMVKRVLQSGMCILIMLI  | 597 |
|    | ****:***** :* *: ** : : * * *...*. : *: :*:**: :*:**          |     |

|    |                                                             |     |
|----|-------------------------------------------------------------|-----|
| SV | WYRPVAEFAQSIQSRIVEWKERLDKEFSLSVYQKMKFNVAMGIGVLDWLRNSDDDDDED | 640 |
| BK | WFRPVADFATDIQSRIVEWKERLDSEISMYTFSRMKYNICMGKCILDITREEDSETED  | 642 |
| JC | WFRPVADFAAAIHERIVQWKERLDLEISMYTFSTMKANVGMGRPILDFPREEDSEAED  | 641 |
| KI | WYRPVSDFDEEIQSNVVYWKEVLNDNYIGLTEFATMQMNVNKGKNILEKWFE-----   | 641 |
| WU | WCRPVSDFHPCIQAKVVYWKELLDKYIGLTEFADMQMNVTNGCNILEKHNA-----    | 648 |
|    | * ***:~* *: .:* *** ** :.: : *: *: * :*:                    |     |

|    |                                                             |     |
|----|-------------------------------------------------------------|-----|
| SV | ENADKNEDGGEKNMEDSGHETGIDSQSQGSF-----QAPQSSQSVHHDNQPYHICRGFT | 694 |
| BK | -----HGSSTESQSQCSSQVSDTSAPAEDSQRSDPHSQELHLCKGFQ             | 684 |
| JC | -----HGSSTESQSQCFVSEASGAD-----TQENCTYHICKGFQ                | 677 |
| KI | -----                                                       | 641 |
| WU | -----                                                       | 648 |

|    |               |     |
|----|---------------|-----|
| SV | CFKKPPPPPEPET | 708 |
| BK | CFKRPKPPPK--- | 695 |
| JC | CFKKPKPPPK--- | 688 |
| KI | -----         | 641 |
| WU | -----         | 648 |

## Deltapolyomavirus

|     |                                                                                                                     |     |
|-----|---------------------------------------------------------------------------------------------------------------------|-----|
| H6  | MDRLLAREEVKELMNLIGLSMACWGNLPLMQQKIRLACKKYHPDKGGDPEKMQRNLNLKE                                                        | 60  |
| H7  | MDKLLGRDEVKELMELIGLNMACWGNLPLIQHKVRLASKKYHPDKGGDPQKMQRNLNLKD                                                        | 60  |
| Q   | MDRLLSRDEVNELMQLIGLSMSNWGNLPLIQHKVREACKKHHHPDKGGDPEKMQRNLNLKD                                                       | 60  |
| SV  | MDKVLNREESLQLMDLLGLERSAWGNIPLMRKAYLKKCKEFHPDKGGDEEKMKKMNTLYK                                                        | 60  |
| H10 | MDRVLSRDEVKELMALLSLNTAAWGNIPLMQYKYRQTCLKLHPDKGGDGEKMKRLNELFS                                                        | 60  |
| STL | MDQALSRAEAKELMGLLGLPEDSWGNVPLISYRYRQKSKIYHPDKGGNEETMKRLTELYS<br>*: * * * : * * *: . * * * * : . : * : . * .         | 60  |
|     |                                                                                                                     |     |
| H6  | KLNATLRDQMSSS--PTWCFSS-EVRPPPYQYSPGWQWADFNRGWDEDEDLYCDEHLSA                                                         | 117 |
| H7  | KLQATLRDQRSGS--PMWHYSSDEVPPPPYGPSPAWDQWWQDFNKGWD-EDLYCTEELSS                                                        | 117 |
| Q   | KFAATMRDQSSGN--PIWHFSSEEVPPPPYGTPEWDKWWHDFNRGW-EDLYCTEELSA                                                          | 117 |
| SV  | KMEDGVKYAHQPDFGGFW----DATEIPTYGTDWEQWNAFNE----ENLFCSEEMP                                                            | 111 |
| H10 | KMYTTIEKLRR-GEVYF----PAKGNPTYGTPEWDQWEEFNRGWD-EDLSCNESFAP                                                           | 113 |
| STL | RMQNTLQNLRSS-SENEN----VFPPGGQYGTPAWEQWEEFNQPF-DDLTCNESFNC<br>: : : . * * : * : * * * . : * * * :                    | 113 |
|     |                                                                                                                     |     |
| H6  | SEEDN-----VD-----PGEQNSQDSKYSCTPPKKRKPNPAPNDFPSCLDHLYLSHA                                                           | 164 |
| H7  | SDEEPAASASVN-----PEEGCSQDSKYSATPPKQKKPNPAPQDFPECLSEFLSHA                                                            | 169 |
| Q   | SDEEQT-----ED-----PEEGCSQNSKYSATPPKQKKPNPAPQDFPECINEYLSHA                                                           | 165 |
| SV  | SDDEATADSQH-----STPPKKRKVEDPKDFPSELLSFLSHA                                                                          | 149 |
| H10 | SDEEPPGPSQASQNTANDTNTPKKRPRESSSNSTCTPPKRPRNFNPVDFPEVLLLEFLSNA                                                       | 173 |
| STL | SDDEGTSASQK-----RKFPDSSTQNSTPPKKNKPADPTDFPAELETFLSHA<br>*: * * * : : * * * * : : * * * :                            | 160 |
|     |                                                                                                                     |     |
| H6  | TLGNKCYTCFVSYTTLEKWETLYDKLQSAFNAVFTGAYKCDNTGAILYCITPRRHRVSA                                                         | 224 |
| H7  | TLGNKCYTCFLCYTTYEKSMLLYEKLGVFENALFIGAYNCVDGSGALVFFISGSRHRVSA                                                        | 229 |
| Q   | TLGNKCYNCFCVYTTMEKSLMLYDKLNNEFNALFIGNYKCDGSGSIVYMITGSRHRPSA                                                         | 225 |
| SV  | VFSNRTLACFAIYTTKEKAALLYKKIMEKYSVTFISRHNS--YNHNILFFLTPHRHRVSA                                                        | 207 |
| H10 | IFSNTLNSFCVLYTTREKQGFLEYKVPKFKAMFYSLHEF--DGDSLFLLLSGKHRVSA                                                          | 231 |
| STL | VFSNKTNSFCVIYTTIEKGNELYTVGPKFKSMFISCHSY--NTCCILFMILAGKHRVSA<br>: . * : . * * * * * : : . * . : . : : : : * * *      | 218 |
|     |                                                                                                                     |     |
| H6  | MLNALSKCCTISFLLIKAVLKSACCYMALQGDEFTVIOESKAEGHLSYDFQEGSK--KEE                                                        | 282 |
| H7  | ILNACKKHCTVSFIMVKAVLKNAECYKALQDSKFAVLRESKEGGLHSYDFQEASK--KDD                                                        | 287 |
| Q   | ILNASKKYCTVSFSLVKAVLKNAECYKALQGNFTVIRESREGGLHSYDFQEASK--KDD                                                         | 283 |
| SV  | INNVAQKLCTFSFLICKGVNKEYLMSALTRDPFSVIEESLPGGLKEHDFNPEEAETKQ                                                          | 267 |
| H10 | IKNYCSNLCTVSFLLVKGCLKAYECYALCKTPFKLIKQSQEHLGSLKTDFCEEEEK--DKV                                                       | 289 |
| STL | LKNFCAALCSISFVLVKSLKPYECYRLCSAPFAVTKQSRPEGLSQAEFMEQEN-SKPS<br>: * : * : * : * : * : * : * : * : *                   | 277 |
|     |                                                                                                                     |     |
| H6  | CDWNQVASFASDSDLTDCLALLGYIEFANDPASCCKKGVKV--HKHHEVHFHNAQLF                                                           | 340 |
| H7  | CDWNFVADFAADMELTDVLLIMGYMEFATEPSLCPKCLKSVKA--HQHHEKHWANAKLF                                                         | 345 |
| Q   | CDWNAVEAFALANDLTDPLIMGYLEFAAEPSLCQCKKGVKA--HKCHELQWSNAKLF                                                           | 341 |
| SV  | VSWKLVTHEYAMETKDDVLLLLGMYLEFQYSFEMCLCKIKKEQPSHYKYHEKHANAAIF                                                         | 327 |
| H10 | VNWQQICEFAVEVQCEDPLLLMGMLLDFAKDVEGCSKCEQKKLKHYYKFHEAQNINSKLF                                                        | 349 |
| STL | VNWQQICEFAVQFNCEPLLLMGIYLDSESPENCEKCKT-ELKHHSQFHEKEYNNAKLF<br>: * : : * : . * * : * : * : . * * : * * : * : *       | 336 |
|     |                                                                                                                     |     |
| H6  | KAAKNQKSIAQQACDRVAAQRRVLMLESTRQDLVLQAFKKQFKILAEQY--AGGVEITQL                                                        | 398 |
| H7  | KTAKNQKGIAQQAADRVLAARRVLMLESTRKDLVMVSFKKQFKVLAEQF--GGGVEITQL                                                        | 403 |
| Q   | KSAKNQRGIAQQAADRVLSARRVMMIESTRVDLVMAFKKQFQVLNDQF--AGGVEITQL                                                         | 399 |
| SV  | ADSKNQKTICQQAVDTVLAKKRVDLSQLTREQMLTNRFNDLLDRMDIMFGSTGSADIEEW                                                        | 387 |
| H10 | KDCKNQKTICQQATDWVTAQRRLILESTREHLLVLRFKHMFEEKMEDI---CGEVEICQY                                                        | 406 |
| STL | RDSKTQKTLCQQACDWVCAKRRVLILESTREDLLVIRFKQVLKEMQDI---AGEVEILRY<br>: . * : : . * * * : : * : : * : : * : : *           | 393 |
|     |                                                                                                                     |     |
| H6  | LGAVAWLDCLQPSFTTKLKEILSILTENIPKKRNVLFKGPINSGKTTLAAAILDLVGGVS                                                        | 458 |
| H7  | IGAVAWLDCLLPQFTTIKIKEMLSYLVENTPKRNNLLFKGPINSGKTTLAAAILDLGGVA                                                        | 463 |
| Q   | LGAVAWLDCLMPSTTKLKEMLTLLVQNYAKRNNLLFKGPINSGKTTVAGIMDLLGGVA                                                          | 459 |
| SV  | MAGVAWLHCLLPKMDSVVYDFLKCMVYNIPKKRYWLFKGPIDSGKTTLAAALLELCGGKA                                                        | 447 |
| H10 | MAGVAWLSLLMPHFDEIILFIIKAMTENVPKRRYVLFKGPINSGKTTVAAAILDLGGKT                                                         | 466 |
| STL | MAGVAWLSLLFNHFDDIVLEIIRTMTVINTPKRRYVLFKGPINSGKTTVAAAILDLGGRT<br>: . * * * * : : : : . * * * * * * * * * * * * * * * | 453 |
|     |                                                                                                                     |     |
| H6  | LNVNCTPDKINFELGCAIDKFMCVIEDVKGTP-MANTNLTQCGMTNLDNLRDYLDCGVP                                                         | 517 |
| H7  | LNVNCSSDKINFELGCAIDKYMVVIDVKGTP-LPNTDLPSGVGMANLDNMRDYLDCGVP                                                         | 522 |



|     |                                                                        |     |
|-----|------------------------------------------------------------------------|-----|
| Q   | LNVNCSDDKINFELGCAIDKMLVVFEDVKGQP-LPNTDLPAGVGMANLDNLRDHLDDGCVF          | 518 |
| SV  | LNVLNPLDRLNFELGVAIDQFLVVFEDVKGTG-GESRDLPSPGQGINNLDNLRDYLDDGCVK         | 506 |
| H10 | LNVNCPDPDKLAFEIGCAIDEYMVVFEDVKGQNEGSNSSLTPGMGMSNLDNLRDHLDDGCVK         | 526 |
| STL | LNINCPPEKVNFEELGCAIDFEMVVFEDVKGQTEGK-TNLTSGMGMNLDNLRDHLDDGCVK          | 512 |
|     | ***: * : : : * *: * * *: : * : * * * * . * * * : * *: * *: * *         |     |
| H6  | VNMERKHLNPKVSQLFPPSVITCNEYVIPCTVKARIARGYYFLHKPCLQKCLKD-CVLMSK          | 576 |
| H7  | VNLERKHINKTSQLFPPCIITCNEYAIPPTVKARVAKGYFFLHKPLKKSOLDANPILMKK           | 582 |
| Q   | VNLERKHTNPKVSQLFPPCIITCNDYAIPTVKARVAKGYFFIHKPNLKKCLDVNPILMQK           | 578 |
| SV  | VNLEKKHLNKRQTQIFPPGIIVTMNEYSVPKTLQARFVKQIDFRPKDYLKHCLERSEFLLEK         | 566 |
| H10 | VNLEKKHVNKKSQIFPPGIITMNDYFIPPTLQARMIKTINFRPKFLRNSLEKNSELLRK            | 586 |
| STL | VNLEKKHLNKRKQIFPPGIITMNEYNVPLTILARMVKVINFRPKHYLKKSLVNNELLHR            | 572 |
|     | ***: * *: * * : * *: * * : : * * *: * : * *: * * : * * : * * : * * : * |     |
| H6  | RLLQKGTTLAALIWWEPVEDFMEELQEDVVNWKQTFERWVSFGMYQTMKENILAGIDPF            | 636 |
| H7  | RLLQKGTTLAALIWWEPVSDFVEEIQEEVVNWKQTFEQWVSYGMFQTMKENILSGKDPF            | 642 |
| Q   | RLLQKGVTLAALIWWEPVSEFVEEIQEDVVNWKQTFERWVTYGYQDMKQNILAGKDPF             | 638 |
| SV  | RIIQSGIALLLMLLIWYRPVAFQAQSIQSRIVEWKERLDKEFSLSVYQKMKFNVAMGIGVL          | 626 |
| H10 | RIVQSGVTLLLLLCCWWQPVIAFHPEIHDNVRYWKETIEKYVPFGMYHDIRRNIESGEDPL          | 646 |
| STL | RIVQSGKTLMLLMWWQPVKVFHSSIHEDVKIWKETLTKYVSIGMFHDMQRNIQNGDDPL            | 632 |
|     | * : * . * : * * * * : * * : * * : * : * : * : * : * : * : * : *        |     |
| H6  | TNVLVDESFFVQPPQEND-ETN-----DSTQESGIGSMHSM-----                         | 669 |
| H7  | EGVLINDPTE---ENT-RET-----QESTESGIGSMNN-----                            | 671 |
| Q   | YGVIMSDIN---EIV-EET-----QESTESGVGSMET-----                             | 666 |
| SV  | DWLRNSDDDDDEDSQENADKNEDGGEKNMEDSGHETGIDSQSQGSFQAPQSSQSVHHDNQF          | 686 |
| H10 | KDILICVDADEDQQDSGINSQ-----                                             | 668 |
| STL | KNILICEDTENNETQDSAFCTQDSDNE-----                                       | 659 |
|     | :                                                                      |     |
| H6  | -----                                                                  | 669 |
| H7  | -----                                                                  | 671 |
| Q   | -----                                                                  | 666 |
| SV  | YHICRGFTCFKKPPTPPPEPET                                                 | 708 |
| H10 | -----                                                                  | 668 |
| STL | -----                                                                  | 659 |

Supplementary Figure S2. Alignment of the HPyV and SV40 sTag. The Alphapolyomaviruses are shown in pink, the Betapolyomaviruses in yellow, and the Deltapolyomaviruses in turquoise. Conserved and partially conserved S, T and Y are highlighted in red, green, and blue, respectively.

|                                           |                                                               |    |
|-------------------------------------------|---------------------------------------------------------------|----|
| SV40                                      | MDKVLNREESLQMDLLGLERSAWGNIPLMRKAYLKKCKEFHPDKGGDEEKMKKMNTLYK   | 60 |
| BKPyV                                     | MDKVLNREESMELMDLLGLERAAGNPLMRKAYLRKCKEFHPDKGGDEEDKMKRMNTLYK   | 60 |
| JC                                        | MDKVLNREESMELMDLLGLDRSAWGNIPVMRKAYLKKCKELHPDKGGDEEDKMKRMNTLYK | 60 |
| KI                                        | MDKTLRSREAAQQLMQLLCLDMSCWGNLPLMRQYLVKCKEYHPDKGGNEESMKLLNSLYL  | 60 |
| WU                                        | MDKTLRSNEAKELMQLLGLDMTCWGNLPLMRTRYLSKCKEFHPDKGGNEEKMKKLNLSLYL | 60 |
| NJ                                        | MEKVLKSDKEMLIELGIPRYAYGNFPIMKTAYKRASKIYHPDKGGSSEKMMLLNSLWQ    | 60 |
| TS                                        | MDKFLSREESLELMDLLQIPRHCGYGNFALMKINHKKMSLKYHPDKGGDPEKMSRLNQLWQ | 60 |
| MC                                        | MDLVNLRKEREALCKLLEIAPNCYGNIPLMKAAFKRSCLKHHHPDKGGNPVIMMELNTLWS | 60 |
| H6                                        | MDRLAREEVKELMNLIGLSMACWGNLPLMQQKIRLACKKYHPDKGGDPEKMQRNLNLKE   | 60 |
| H7                                        | MDKLLGRDEVKELMELIGLNMACWGNLPLIQHKVRLASKKYHPDKGGDPQKMQRNLNLKD  | 60 |
| Q                                         | MDRLSRDEVNELMQLIGLSMSNWGNLPLIQHKVREACKKHHHPDKGGDPEKMQRNLNLKD  | 60 |
| H9                                        | MDQTLSEERNELMDLLQLTRAAGNLSLMKKAYKTVSKIYHPDKGGNPEKMQRNLNELFQ   | 60 |
| H10                                       | MDRVLRSDEVKELMALLSLNTAAWGNIPLMQYKYRQTCLKLHPDKGGDGEKMKRLNELFS  | 60 |
| STL                                       | MDQALSRAEAKELMGLLGLPEDSWGNVPLISYRYRQKSKIYHPDKGGNEETMKRLTTELYS | 60 |
| *: * : * *: : **: : . * * * * * . * : . * |                                                               |    |

|           |                                                              |     |
|-----------|--------------------------------------------------------------|-----|
| SV40      | KMEDGVKYAHQPD--FGGFWDATVFA[S]S-----LNPGV-----DAM[CKQWP       | 101 |
| BKPyV     | KMEQDVKVAHQPD--FGT-WSSSEV-CAD----FPLCP-----DTL[CKEWP         | 99  |
| JC        | KMEQGVKVAHQPD--FGT-WNSSEV-GCD----FPPNS-----DTL[CKEWP         | 99  |
| KI        | KLQDSVSSVHDLNEEEDNIWQSSQV[CKDLCCN----KFRLVNAIYGE-YYEAYIMKQWD | 115 |
| WU        | KLQECVSTVHQLNEEEDVWSSSQV[ELCCNFPPRK[RLVGEVYGD-VFEEYILKDWD    | 119 |
| NJ        | KFQEGLEIVRDE[---VCQVSFSD[-----DS[LLKCCSPKVFHELF-LRSP         | 104 |
| TS        | KLQEGTYNARQEF---PTSF-SSQVGSW----YWEANLISLKEYFGKKKYDENVIKHW   | 111 |
| MC        | KFQQNIHKLRSDF---SMFDEVS--[KF-----PW-EE[GLKDYMQS-GYNARFCRGP   | 108 |
| H6        | KLNATLRDQMSSS---PTWCFSSSEV[DD-----W-GIPLTVGEFLGP-EFHKKKVWDFC | 109 |
| H7        | KLQATLRDQSGS---PMWHYSSDEVSF-----W-DIELTVGEFLGP-EFNRKKVWNYN   | 109 |
| Q         | KFAATMRDQSSGN---PIWHFSSEVSF-----W-DLQLTVGEFLGV-EFNRKKLWNFE   | 109 |
| H9        | KLQVTLLEIRSNC---GSSS--SQVAV[-----FWDENFRTLGAFLGE-KFNQRIIGYP  | 109 |
| H10       | KMYTTIEKLRE-----GEVYFPAKVG[-----FIDDVTLGDVLGP-SFEKKIYIWP     | 108 |
| STL       | RMQNTLQNLRSSS---ENENVFPPVRML-----LLSD[FTLGDLLGP-QFESKVIIFIWP | 110 |
| : : : : . |                                                              |     |

|               |                                                                 |     |
|---------------|-----------------------------------------------------------------|-----|
| SV40          | ECAKMS[ANCICLLCLLRMKHENRK----LYRKDPLVWVDC[CFDCFRMWFGDLDC-EG     | 155 |
| BKPyV         | ICSKKPS-VHCPCLMCQLRLRHLNRK----FLRKEPLVWIDC[CFIDFTQWFGDLDT-EE    | 153 |
| JC            | NCATNPS-VHCPCLMCMLKLRHRNRK----FLRSSPLVWIDC[CFDCFRQWFGCDLT-QE    | 153 |
| KI            | VCIHGYN-HEQCICILSKYHKEY---KIYRKPPVWIEC[CKC[RECFFFPIS-MQ         | 169 |
| WU            | ICLKGFY-YLCNCFYCFLDKRHKQKY---KIFRKPPMWIEC[CKC[REWFGFEIS-AE      | 173 |
| NJ            | QCLLKGP-TSCSCITSCLYNQHRQIK---LCGKKRCLTWGNCFCFSCFILWFGGLRET-WK   | 159 |
| TS            | QCAEKAL-KECKCLTCKIGLQHYVYK---QMHQKKCVWGEFC[CKC[CAWFGEDLYCLD     | 167 |
| MC            | CMLKQLRDSKACISCKLSRQHCSLK---TLKQKNCLTWGEFC[CKC[QCFILWFGFPPT-WE  | 164 |
| H6            | LCVQQGI-SSCKCLHCLLKKEHKKQV---EINLGKPTIWGKCWC[CKC[CLWFGLPVE-AD   | 164 |
| H7            | LCVLQGL-RACCCIHCILKRKHKKAKKEYAKDHRGPLLWGKCWCFC[CKC[LDWFGVERS-EE | 167 |
| Q             | LCVLQGL-RACCCILHCLLRKHKKLAKQMAKDQKGPLVWGHWCFC[CKC[QWFGEDKN-KE   | 167 |
| H9            | DCITYN-KPSCCIVCLLKQQHKSTK---INKKKPCLVWGEFC[CKC[LLWFGFPED-FT     | 164 |
| H10           | LCASDLLRHKCGVCCLLKQHRNDK---LAKQKQCLVWGEFC[CKC[FLWFGQFEG-YT      | 164 |
| STL           | TCACRYRTFCKCICILKRQHDEIK---QVRKKPCVTWGEFC[CKC[FLWFGCDFT-KT      | 166 |
| * * . . : *   |                                                                 |     |
| * . *: * *: * |                                                                 |     |

|           |                                            |     |
|-----------|--------------------------------------------|-----|
| SV40      | TLLWCDIIGQTT[RDCLKL-----                   | 174 |
| BKPyV     | TLQWVQIIGETPFRDLKL-----                    | 172 |
| JC        | ALHCWEKVLGDT[RDCLKL-----                   | 172 |
| KI        | TFFFWKVIIFNTEIRAVQPLLR-----                | 191 |
| WU        | TFFYWKKIIFLT[MQVGL[LR-----                 | 194 |
| NJ        | TFEIWKHVIAQMPAALLQL[PSLF-----              | 183 |
| TS        | SLWAW[SCIVGEVDFHLVNL[LRVNQGFNWGK-----      | 198 |
| MC        | SFDWWQKTLEE[TD[CLLHLHLF-----               | 186 |
| H6        | SFMWW[SHIYQ[PLDWLGI[TEKLIWW-----           | 190 |
| H7        | SFMWW[SHIIFQ[IPMDVLNLWGQLNLL-----          | 193 |
| Q         | SFEWW[QIYGT[QMDVINIWQINLL-----             | 193 |
| H9        | SFNYW[LLMRNMDLSLLRLWTELGF-----             | 189 |
| H10       | SFFWWKHIMHN[TEFDLLCLLGELILWVSYSFILGKSHLWDS | 206 |
| STL       | SLHAWKHVMFNLDLDLLMFKQLNLVSFSF-----         | 195 |
| : : * : : |                                            |     |
